# Supplementary material for: Engineering of halohydrin dehalogenases for the regio- and stereoselective synthesis of (S)-4-aryl-2-oxazolidinones
Source: Royal Society of Chemistry journal article supplement (doi:10.1039/d3cy01584j), 2024-01-01
Supplement: d3cy01584j1.pdf [file d3cy01584j1.pdf]

### Supporting Information

Engineering of halohydrin dehalogenase for the regio- and stereoselective synthesis of (*S*)-4-aryl-2-oxazolidinones

**Authors:** Jinsong Song<sup>a,b</sup>, Chuanhua Zhou<sup>c</sup>, Xi Chen<sup>b</sup>, Feng Xue<sup>a\*</sup>, Qiaqing Wu<sup>b\*</sup>, and Dunming Zhu<sup>b</sup>

<sup>a</sup> School of Food Science and Pharmaceutical Engineering, Nanjing Normal University, NO. 1, Wenyuan Road, Nanjing 210023, People's Republic of China

<sup>b</sup> National Engineering Laboratory for Industrial Enzymes and Tianjin Engineering Research Center of Biocatalytic Technology, Tianjin Institute of Industrial Biotechnology, Chinese Academy of Sciences, 32 Xi Qi Dao, Tianjin Airport Economic Area, Tianjin 300308, China

<sup>c</sup> Tianjin Changlu Haijing Group Co., Ltd. No. 1088, Yingkou Road, Tanggu, Binhai New Area, Tianjin, 300450, China

**\*Corresponding author:**

Feng Xue

E-mail address: xuef2020@njnu.edu.cn;

Tel.: +86-25-58889625;

Fax: +86-25-58889625

Qiaqing Wu

E-mail address: wu\_qq@tib.cas.cn;

Tel.: +86-022-84861963;

Fax: +86-022-84861996

### Preparation of chemicals

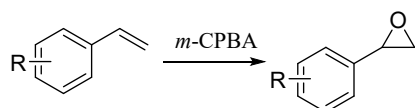

**Scheme 1.** Methods for the synthesis of **1c-1e**, **1g**, **1h** and **1j**.

The substrates styrene oxide derivatives **1c-1e**, **1g**, **1h** and **1j** were prepared from commercially available substituted styrene via reaction with *meta*-chloroperoxybenzoic acid (*m*-CPBA)<sup>1</sup>.

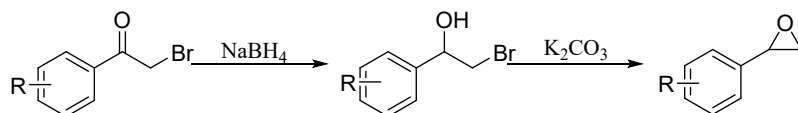

**Scheme 2.** Methods for the synthesis of **1b**, **1f**, **1i**, **1k** and **1l**.

The substrates **1b**, **1f**, **1i**, **1k** and **1l** were prepared from the corresponding substituted 2-bromo-1-phenylethan-1-one by two-step reactions<sup>2</sup>.

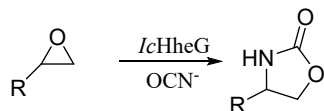

**Scheme 3.** Methods for the synthesis of (*R/S*)-**2a-2l**.

Racemic **2a-2l** were synthesized from epoxides **1a-1l** using *IcHheG*. The reaction system consisted of 40 mL Tris-SO<sub>4</sub> buffer (50 mM, pH 7.5), 50 g/L *E. coli* (*IcHheG*), 50 mM substrate, 75 mM NaOCN and 2.5% DMSO as a co-solvent. The bacteria were re-suspended, mixed and reacted at 200 rpm at 30 °C for 6 h, and the reaction was terminated by adding the same amount of petroleum ether (3×40 mL). The remaining aqueous phase was extracted three times with the same volume of ethyl acetate. After the organic phase was combined, it was cleaned three times with saturated salt water and deionized water respectively. The organic phase was dried by anhydrous Na<sub>2</sub>SO<sub>4</sub>, and then concentrated to obtain oxazolidinone. The crude products were purified by preparative TLC with the spreading solvent (n-hexane/ethyl acetate 1:1). These purified racemic compounds were identified by NMR analysis.

### General procedure for the Synthesis of chiral oxazolidinones by enzymatic kinetic resolution

The reaction system consisted of 40 mL Tris-SO<sub>4</sub> buffer (50 mM, pH 7.5), 50 g/L *E. coli* (*IcHheG*-I104F/N196W), 15-50 mM substrate, 1.5 eq NaOCN and 2.5% DMSO as a co-solvent. The wet cells with HHDHs were re-suspended, mixed and reacted at 200 rpm at 30 °C for 6 h, and the reaction was extracted by petroleum ether (3×40 mL). Combine organic phase and dry with anhydrous sodium sulfate. The chiral epoxide (*S*)-**1a-1l** was obtained by evaporating under reduced pressure and confirmed by GC analysis.

The remaining aqueous phase was extracted three times with the same volume of ethyl acetate. The combined organic phase was washed with saturated salt water 3 times and deionized water 3 times. The organic layer was dried with anhydrous sodium sulfate and concentrated under reduced pressure to obtain chiral oxazolidinones (*S*)-**2a-2l**. The crude products were purified by preparative TLC with the spreading solvent (n-hexane/ethyl acetate 1:1). Chiral oxazolidinones were identified by NMR and HPLC analysis.

**(S)-4-phenyloxazolidin-2-one (2a)**

White solid, 136 mg, 42% yield, 96% *ee*; Chiralpak IC, *n*-hexane/*i*-PrOH=80/20, flow rate 1 mL/min,  $\lambda$ =210 nm,  $t(S)$ -**2a**=27.3 min,  $t(R)$ -**2a** =40.5 min. <sup>1</sup>H NMR (400MHz, CDCl<sub>3</sub>)  $\delta$  = 7.45 - 7.22 (m, 5H), 6.42 (br. s., 1H), 4.95 (t, *J* = 7.7 Hz, 1H), 4.72 (t, *J* = 8.6 Hz, 1H), 4.16 (t, *J* = 7.7 Hz, 1H). <sup>13</sup>C NMR (100 MHz, CDCl<sub>3</sub>)  $\delta$  159.93, 139.46, 129.13, 128.73, 125.97, 72.49, 56.32.

**(S)-4-(2-tolyl)oxazolidin-2-one (2b)**

White solid, 99 mg, 28% yield, 81% *ee*; Chiralpak OD-H, *n*-hexane/*i*-PrOH = 90/10, flow rate 0.6 mL/min,  $\lambda$  = 220 nm,  $t(S)$ -**2b**= 67.2 min,  $t(R)$ -**2b** = 44.5 min. <sup>1</sup>H NMR (400MHz, CDCl<sub>3</sub>)  $\delta$  = 7.49 - 7.39 (m, 1H), 7.34 - 7.11 (m, 3H), 6.27 - 6.09 (m, 1H), 5.27 - 5.17 (m, 1H), 4.78 (t, *J* = 8.6 Hz, 1H), 4.10 (t, *J* = 7.7 Hz, 1H), 2.30 (s, 3H). <sup>13</sup>C NMR (100 MHz, CDCl<sub>3</sub>)  $\delta$  159.96, 137.46, 134.56, 130.87, 128.28, 126.92, 124.67, 71.55, 53.11, 19.01.

**(S)-4-(3-tolyl)oxazolidin-2-one (2c)**

White solid, 128 mg, 36% yield, 58% *ee*; Chiralpak OD-H, *n*-hexane/*i*-PrOH = 95/5, flow rate 0.6 mL/min,  $\lambda$  = 220 nm,  $t(S)$ -**2c**= 89.9 min,  $t(R)$ -**2c**= 86.4 min. <sup>1</sup>H NMR (400MHz, CDCl<sub>3</sub>)  $\delta$  = 7.27 (d, *J* = 7.8 Hz, 1H), 7.21 - 7.06 (m, 3H), 5.99 - 5.82 (m, 1H), 4.96 - 4.86 (m, 1H), 4.72 (t, *J* = 8.7 Hz, 1H), 4.18 (dd, *J* = 7.2, 8.2 Hz, 1H), 2.37 (s, 3H). <sup>13</sup>C NMR (100 MHz, CDCl<sub>3</sub>)  $\delta$  159.63, 139.39, 139.06, 129.55, 129.06, 126.62, 123.09, 72.54, 56.30, 21.37.

**(S)-4-(4-tolyl)oxazolidin-2-one (2d)**

White solid, 188 mg, 53% yield, 66% *ee*; Chiralpak OD-H, *n*-hexane/*i*-PrOH = 90/10, flow rate 0.6 mL/min,  $\lambda$  = 220 nm,  $t(S)$ -**2d**= 60.1 min,  $t(R)$ -**2d**= 46.4 min. <sup>1</sup>H NMR (400MHz, CDCl<sub>3</sub>)  $\delta$  = 7.21 (d, *J* = 1.7 Hz, 4H), 6.11 - 6.03 (m, 1H), 4.96 - 4.85 (m, 1H), 4.70 (s, 1H), 4.16 (d, *J* = 7.3 Hz, 1H), 2.35 (s, 3H). <sup>13</sup>C NMR (100 MHz, CDCl<sub>3</sub>)  $\delta$  159.75, 138.66, 136.41, 129.78, 125.95, 72.61, 56.14, 21.09.

**(S)-4-(2-fluorophenyl)oxazolidin-2-one (2e)**

White solid, 46 mg, 47% yield, 97% *ee*; Chiralpak OD-H, *n*-hexane/*i*-PrOH = 90/10, flow rate 0.6 mL/min,  $\lambda$  = 220 nm,  $t(S)$ -**2e**= 36.7 min,  $t(R)$ -**2e**= 47.5 min. <sup>1</sup>H NMR (400MHz, CDCl<sub>3</sub>)  $\delta$  = 7.44 - 7.33

(m, 1H), 7.26 (s, 1H), 7.13 (d,  $J = 7.8$  Hz, 1H), 7.07 (d,  $J = 8.8$  Hz, 2H), 6.04 - 5.87 (m, 1H), 4.96 (d,  $J = 7.6$  Hz, 1H), 4.75 (t,  $J = 8.7$  Hz, 1H), 4.17 (s, 1H).  $^{13}\text{C}$  NMR (100 MHz,  $\text{CDCl}_3$ )  $\delta$  164.41, 161.95, 159.43, 142.04, 141.97, 130.99, 130.92, 121.60, 115.98, 115.77, 113.16, 112.94, 72.23, 55.87.

**(S)-4-(4-fluorophenyl)oxazolidin-2-one (2f)**

White solid, 161 mg, 45% yield, 99% *ee*; Chiralpak OD-H, *n*-hexane/*i*-PrOH = 90/10, flow rate 0.6 mL/min,  $\lambda = 220$  nm,  $t(\text{S})\text{-2f} = 39.4$  min,  $t(\text{R})\text{-2f} = 45.7$  min.  $^1\text{H}$  NMR (400MHz,  $\text{CDCl}_3$ )  $\delta = 7.38 - 7.22$  (m, 2H), 7.10 (t,  $J = 8.4$  Hz, 2H), 5.99 (br. s., 1H), 4.96 (t,  $J = 7.7$  Hz, 1H), 4.73 (t,  $J = 8.7$  Hz, 1H), 4.22 - 4.08 (m, 1H).  $^{13}\text{C}$  NMR (100 MHz,  $\text{CDCl}_3$ )  $\delta$  164.09, 161.62, 159.54, 135.18, 135.18, 127.87, 127.79, 116.30, 116.09, 72.50, 55.76.

**(S)-4-(2-chlorophenyl)oxazolidin-2-one (2g)**

White solid, 56 mg, 14% yield, 98% *ee*; Chiralpak OD-H, *n*-hexane/*i*-PrOH = 90/10, flow rate 0.6 mL/min,  $\lambda = 220$  nm,  $t(\text{S})\text{-2g} = 42.5$  min,  $t(\text{R})\text{-2g} = 60.4$  min.  $^1\text{H}$  NMR (400MHz,  $\text{CDCl}_3$ )  $\delta = 7.50$  (s, 1H), 7.45 - 7.25 (m, 3H), 6.52 - 6.37 (m, 1H), 5.38 (br. s., 1H), 4.90 (s, 1H), 4.15 (dd,  $J = 6.4, 8.6$  Hz, 1H).  $^{13}\text{C}$  NMR (100 MHz,  $\text{CDCl}_3$ )  $\delta$  159.99, 137.25, 132.05, 129.90, 127.63, 126.12, 71.29, 53.22.

**(S)-4-(3-chlorophenyl)oxazolidin-2-one (2h)**

White solid, 169 mg, 43% yield, 98% *ee*; Chiralpak OD-H, *n*-hexane/*i*-PrOH = 95/5, flow rate 0.6 mL/min,  $\lambda = 220$  nm,  $t(\text{S})\text{-2h} = 104.8$  min,  $t(\text{R})\text{-2h} = 120.7$  min.  $^1\text{H}$  NMR (400MHz,  $\text{CDCl}_3$ )  $\delta = 7.42 - 7.20$  (m, 4H), 5.94 (br. s., 1H), 5.60 (t,  $J = 8.1$  Hz, 1H), 4.01 (t,  $J = 8.7$  Hz, 1H), 3.52 (t,  $J = 8.1$  Hz, 1H).  $^{13}\text{C}$  NMR (100 MHz,  $\text{CDCl}_3$ )  $\delta$  159.40, 140.44, 134.92, 130.27, 129.07, 125.76, 123.65, 48.13.

**(S)-4-(4-chlorophenyl)oxazolidin-2-one (2i)**

White solid, 162 mg, 41% yield, 98% *ee*; Chiralpak OD-H, *n*-hexane/*i*-PrOH = 90/10, flow rate 0.6 mL/min,  $\lambda = 220$  nm,  $t(\text{S})\text{-2i} = 53.2$  min,  $t(\text{R})\text{-2i} = 58.2$  min.  $^1\text{H}$  NMR (400MHz,  $\text{CDCl}_3$ )  $\delta = 7.38$  (d,  $J = 8.3$  Hz, 2H), 7.28 (d,  $J = 8.6$  Hz, 2H), 6.24 (br. s., 1H), 4.95 (s, 1H), 4.79 - 4.68 (m, 1H), 4.20 - 4.09 (m, 1H).  $^{13}\text{C}$  NMR (100 MHz,  $\text{CDCl}_3$ )  $\delta$  159.68, 137.94, 134.69, 129.39, 127.40, 72.33, 55.76.

**(S)-4-(3-bromophenyl)oxazolidin-2-one (2j)**

White solid, 115 mg, 24% yield, 98% *ee*; Chiralpak OD-H, *n*-hexane/*i*-PrOH = 90/10, flow rate 0.6 mL/min,  $\lambda = 220$  nm,  $t(\text{S})\text{-2j} = 64.1$  min,  $t(\text{R})\text{-2j} = 59.6$  min.  $^1\text{H}$  NMR (400MHz,  $\text{CDCl}_3$ )  $\delta = 7.48$  (s, 2H), 7.27 (d,  $J = 4.4$  Hz, 2H), 6.65 - 6.51 (m, 1H), 4.93 (t,  $J = 7.8$  Hz, 1H), 4.72 (t,  $J = 8.8$  Hz, 1H), 4.15 (dd,  $J = 7.1, 8.3$  Hz, 1H).  $^{13}\text{C}$  NMR (100 MHz,  $\text{CDCl}_3$ )  $\delta$  159.83, 141.84, 131.86, 130.76, 129.10, 124.59, 123.17, 123.15, 72.19, 55.73.

**(S)-4-(4-bromophenyl)oxazolidin-2-one (2k)**

White solid, 192 mg, 40% yield, 98% *ee*; Chiralpak OD-H, *n*-hexane/*i*-PrOH = 90/10, flow rate 0.6 mL/min,  $\lambda = 220$  nm,  $t(S)\text{-2k} = 61.1$  min,  $t(R)\text{-2k} = 69.4$  min.  $^1\text{H NMR}$  (400MHz,  $\text{CDCl}_3$ )  $\delta = 7.53$  (d,  $J = 8.1$  Hz, 2H), 7.22 (d,  $J = 8.1$  Hz, 2H), 6.29 (br. s., 1H), 4.93 (t,  $J = 7.8$  Hz, 1H), 4.73 (t,  $J = 8.7$  Hz, 1H), 4.13 (t,  $J = 7.7$  Hz, 1H).  $^{13}\text{C NMR}$  (100 MHz,  $\text{CDCl}_3$ )  $\delta$  159.61, 138.45, 132.36, 127.71, 122.81, 72.25, 55.82.

**(S)-4-(3,4-dichlorophenyl)oxazolidin-2-one (2l)**

White solid, 111 mg, 24% yield, 97% *ee*; Chiralpak OD-H, *n*-hexane/*i*-PrOH = 80/20, flow rate 0.4 mL/min,  $\lambda = 220$  nm,  $t(S)\text{-2l} = 36.9$  min,  $t(R)\text{-2l} = 44.8$  min.  $^1\text{H NMR}$  (400MHz,  $\text{CDCl}_3$ )  $\delta = 7.53 - 7.41$  (m, 2H), 7.19 (dd,  $J = 1.5, 8.1$  Hz, 1H), 6.69 (br. s., 1H), 4.94 (t,  $J = 7.7$  Hz, 1H), 4.74 (t,  $J = 8.8$  Hz, 1H), 4.13 (dd,  $J = 6.8, 8.3$  Hz, 1H).  $^{13}\text{C NMR}$  (100 MHz,  $\text{CDCl}_3$ )  $\delta$  159.78, 137.74, 133.39, 132.94, 131.23, 128.09, 125.24, 72.05, 55.35.

**Table S1** Oligonucleotide sequences used in this study.

| Target sites | Oligonucleotide sequences      |
|--------------|--------------------------------|
| Y18A         | GCAACCGGTGCAGTTGGTCCGGCAC      |
| 18R          | CCAGGCATGCACTATCCAGGCGACC      |
| V100A        | GTGCATGCCTGGCAACCGGCCTGAT      |
| T101A        | GCATGCCTGGTGGCAGGCCTGATTG      |
| L103A        | GCCTGGTGACCGGCGCAATTGTTAC      |
| I104A        | GGTGACCGGCCTGGCAGTTACCGGCAAA   |
| 100-104R     | CCACTGCGCGAACAATACCATTGGC      |
| T151A        | GTGTGTTGTGTTTGCAAGTGCCACCGG    |
| T154A        | GTTTACCAGTGCCGCAGGCGGTTCGTC    |
| 151-154R     | GGAACCTGGGCTTCAATCATTGCGC      |
| T195A        | GCAATTGGTGCAAATTATATGGATTTCCCG |
| N196A        | GCAATTGGTACCGCATATATGGATTTCCCG |
| Y197A        | GCAATTGGTACCAATGCAATGGATTTCCCG |
| F200A        | CCAATTATATGGATGCACCGGGCTTTCT   |
| 195-200R     | GAAAACGATTACTACCATCCAGCAGGCC   |
| L103G/I104A  | GGTGACCGGCGGTGCAGTTACCGGCAAA   |
| L103G/I104-R | CCACTGCGCGAACAATACCATTGGC      |

The above primers were used for site-specific mutagenesis. The amino acid at each site mutates into 19 other amino acids, and the corresponding codon preferred by *E. coli* was selected to replace the red-marked codon.

**Table S2** Summary of HHDHs catalyzed SO for the synthesis of oxazolidinone from the recent literature<sup>3,4</sup>.

| Entry <sup>a</sup> | HHDH                 | Substrate    | Relative activity <sup>b</sup><br>[%] | Ratio <b>2a:3a</b> | <b>2a ee</b> <sup>c</sup> [%] |
|--------------------|----------------------|--------------|---------------------------------------|--------------------|-------------------------------|
| 1 <sup>3</sup>     | Control <sup>d</sup> | SO           | <1                                    | ND                 | ND                            |
| 2 <sup>3</sup>     | CsHheA               | SO           | 31                                    | 26:74              | 32 ( <i>R</i> )               |
| 3 <sup>3</sup>     | CsHheB               | SO           | 66                                    | 12:88              | 79 ( <i>R</i> )               |
| 4 <sup>3</sup>     | GbHheB               | SO           | 49                                    | 57:43              | 69 ( <i>R</i> )               |
| 5 <sup>3</sup>     | ArHheC               | SO           | 94                                    | 41:59              | 72 ( <i>S</i> )               |
| 6 <sup>3</sup>     | SsHheD               | SO           | 80                                    | 95:5               | 38 ( <i>R</i> )               |
| 7 <sup>3</sup>     | EbHheD               | SO           | 72                                    | 96:4               | 42 ( <i>R</i> )               |
| 8 <sup>3</sup>     | NiHheG               | SO           | 35                                    | 97:3               | 65 ( <i>R</i> )               |
| 9 <sup>3</sup>     | AcHheG               | SO           | 57                                    | 99:1               | 34 ( <i>S</i> )               |
| 10 <sup>3</sup>    | AbHheG               | SO           | 135                                   | 98:2               | 30 ( <i>R</i> )               |
| 11 <sup>3</sup>    | IcHheG               | SO           | 100                                   | 91:9               | 31 ( <i>S</i> )               |
| 12 <sup>4</sup>    | IcHheG <sup>ef</sup> | <i>R</i> -SO | ND                                    | ND                 | >99 ( <i>S</i> )              |
| 13 <sup>4</sup>    | IcHheG <sup>ef</sup> | <i>S</i> -SO | ND                                    | ND                 | >99 ( <i>R</i> )              |

<sup>a</sup> Reaction conditions: 1 mL Tris-SO<sub>4</sub> buffer (50 mM, pH 7.5), 1a (10 mM), 1% DMSO, NaOCN (15 mM), wet cells of *E. coli* (HHDH) (25 g/L), 30 °C. <sup>b</sup> The amount of product performed at 2.5 h was used to indicate the activity. As the positive control, the activity of *IcHheG* was defined as 100% and the selectivity data are from the references. <sup>c</sup> Absolute configurations were determined by comparison with references. <sup>d</sup> Host *E. coli* BL21(DE3) cells without the HHDH gene were used. <sup>e</sup> Configurations were defined using commercial enantiopure (*R*)-2a and (*S*)-2a. The *ee* values were determined by chiral HPLC. <sup>f</sup> Reaction conditions: PB buffer (50 mM, pH 7.5) 30 mL, cell density 15 g cdw/L, epoxides conc. 15 mM, NaOCN conc. 45 mM, reaction temperature 30 °C, reaction time 12 h. ND=not determined. All reactions were performed in triplicate.

**Table S3** Alanine-scanning mutagenesis of wild-type *IcHheG* with **1a**.<sup>a</sup>

| Mutant | Relative activity (%) | <b>2a:3a</b>    | <b>2a ee</b> (%) |
|--------|-----------------------|-----------------|------------------|
| WT     | 100 <sup>b</sup>      | 93:7            | 33 ( <i>S</i> )  |
| Y18A   | 0                     | -               | -                |
| L103A  | 133                   | 99:1            | 50 ( <i>S</i> )  |
| I104A  | 0                     | -               | -                |
| T151A  | 0                     | -               | -                |
| A153L  | 0                     | -               | -                |
| T154A  | 0                     | -               | -                |
| T195A  | 6                     | ND <sup>c</sup> | ND               |
| N196A  | 43                    | 95:5            | 34 ( <i>R</i> )  |
| Y197A  | 0                     | -               | -                |
| F200A  | 0                     | -               | -                |

<sup>a</sup> Reactions were carried out in 1 mL Tris-SO<sub>4</sub> buffer (50 mM, pH 7.5) containing *E. coli* (HHDH) wet cells (50 g/L), 1% v/v DMSO, **1a** (10 mM) and NaOCN (15 mM) at 30 °C, 200 rpm for 3 h. <sup>b</sup>The activity of wild type *IcHheG* towards **1a** was defined as 100%. <sup>c</sup>ND means not detected.



**Table S4** Relative activity, regio- and stereoselectivity of mutants towards **1a** by using resting cells.<sup>a</sup>

| Mutant | Relative activity (%) | Ratio <b>2a:3a</b> | <b>2a ee</b> (%) |
|--------|-----------------------|--------------------|------------------|
| Y18H   | 82                    | >99:1              | 82 (S)           |
| Y18F   | 122                   | >99:1              | 65 (S)           |
| L103G  | 99                    | >99:1              | 83 (S)           |
| L103Q  | 130                   | >99:1              | 39 (S)           |
| L103E  | 121                   | >99:1              | 39 (S)           |
| L103T  | 155                   | 98:2               | 32 (S)           |
| L103W  | 150                   | 96:4               | 48 (S)           |
| L103F  | 67                    | 98:2               | 71 (S)           |
| L103V  | 166                   | 97:3               | 24 (S)           |
| L103Y  | 148                   | 99:1               | 40 (S)           |
| L103D  | 155                   | 98:2               | 34 (S)           |
| L103R  | 127                   | >99:1              | 51 (S)           |
| L103N  | 129                   | 98:2               | 56 (S)           |
| L103M  | 150                   | 98:2               | 42 (S)           |
| L103K  | 137                   | 97:3               | 50 (S)           |
| L103I  | 125                   | >99:1              | 34 (S)           |
| L103S  | 133                   | >99:1              | 49 (S)           |
| L103H  | 134                   | >99:1              | 44 (S)           |
| I104N  | 70                    | 99:1               | 95 (S)           |
| I104Y  | 102                   | 99:1               | 82 (S)           |
| I104T  | 28                    | 98:2               | 84 (S)           |
| I104H  | 105                   | 97:3               | 75 (S)           |
| I104L  | 102                   | 99:1               | 69 (S)           |
| I104C  | 100                   | 99:1               | 65 (S)           |
| I104Q  | 70                    | 99:1               | 83 (S)           |
| I104M  | 121                   | >99:1              | 50 (S)           |
| I104S  | 44                    | 96:4               | 91 (S)           |
| I104E  | 35                    | 99:1               | 83(S)            |
| I104F  | 80                    | 97:3               | 81 (S)           |
| N196G  | 102                   | 95:5               | 30 (R)           |
| N196C  | 126                   | 99:1               | 36 (S)           |
| N196Y  | 7                     | ND                 | ND               |
| N196Q  | 2                     | ND                 | ND               |
| N196W  | 82                    | >99:1              | 75 (S)           |
| N196L  | 116                   | 98:2               | 22 (S)           |
| N196H  | 67                    | >99:1              | 60 (S)           |
| N196F  | 48                    | >99:1              | 67 (S)           |
| N196M  | 15                    | >99:1              | 22 (S)           |
| N196S  | 4                     | ND                 | ND               |

<sup>a</sup> Reactions were carried out in 1 mL Tris-SO<sub>4</sub> buffer (50 mM, pH 7.5) containing *E. coli* (HHDH) wet cells (50 g/L), 1% v/v DMSO, **1a** (10 mM) and NaOCN (15 mM) at 30 °C, 200 rpm for 3 h.

**Table S5** Relative activity, regio- and stereoselectivity of multisite variants toward styrene oxide.<sup>a</sup>

| <i>IcHheG</i> mutants | Relative activity(%) | <b>2a:3a</b> | <b>2a ee (%)</b> |
|-----------------------|----------------------|--------------|------------------|
| WT                    | 100                  | 93:7         | 33 ( <i>S</i> )  |
| Y18F/L103K            | 99                   | >99:1        | 73 ( <i>S</i> )  |
| Y18F/L103F            | 98                   | >99:1        | 60 ( <i>S</i> )  |
| Y18F/L103H            | 106                  | >99:1        | 64 ( <i>S</i> )  |
| Y18F/L103D            | 109                  | >99:1        | 64 ( <i>S</i> )  |
| Y18F/L103R            | 82                   | >99:1        | 76 ( <i>S</i> )  |
| Y18F/L103E            | 112                  | >99:1        | 52 ( <i>S</i> )  |
| Y18F/L103M            | 97                   | >99:1        | 72 ( <i>S</i> )  |
| Y18F/L103Q            | 96                   | >99:1        | 72 ( <i>S</i> )  |
| Y18F/L103N            | 100                  | >99:1        | 61 ( <i>S</i> )  |
| Y18F/L103C            | 101                  | >99:1        | 72 ( <i>S</i> )  |
| Y18F/L103G            | 97                   | >99:1        | 75 ( <i>S</i> )  |
| Y18W/N196W            | 22                   | 99:1         | 95 ( <i>S</i> )  |
| Y18H/N196W            | 34                   | 98:2         | 32 ( <i>R</i> )  |
| Y18M/N196W            | 4                    | ND           | ND               |
| Y18N/N196W            | 26                   | 97:3         | 96 ( <i>S</i> )  |
| Y18H/N196F            | 23                   | 96:4         | 12 ( <i>S</i> )  |
| Y18H/N196L            | 13                   | 94:6         | 15 ( <i>S</i> )  |
| Y18H/N196M            | 55                   | >99:1        | 37 ( <i>S</i> )  |
| Y18H/N196G            | 31                   | 95:5         | 67 ( <i>R</i> )  |
| L103G/I104N           | 32                   | 95:5         | 91 ( <i>S</i> )  |
| L103G/I104T           | 61                   | 95:5         | 88 ( <i>S</i> )  |
| L103G/I104F           | 76                   | 98:2         | 95 ( <i>S</i> )  |
| L103G/I104Y           | 85                   | 98:2         | 77 ( <i>S</i> )  |
| L103G/I104M           | 125                  | 96:4         | 62 ( <i>S</i> )  |
| L103G/I104R           | 50                   | 93:7         | 95 ( <i>S</i> )  |
| L103G/I104E           | 25                   | 90:10        | 87 ( <i>S</i> )  |
| L103G/I104G           | 23                   | 93:7         | 89 ( <i>S</i> )  |
| L103G/I104K           | 35                   | 92:8         | 89 ( <i>S</i> )  |
| L103G/T195S           | 42                   | 85:15        | 71 ( <i>S</i> )  |
| L103G/T195M           | 30                   | 99:1         | 94 ( <i>S</i> )  |
| L103G/T195W           | 77                   | 98:2         | 80 ( <i>S</i> )  |
| L103G/N196C           | 204                  | 98:2         | 49 ( <i>S</i> )  |
| L103G/N196F           | 54                   | >99:1        | 76 ( <i>S</i> )  |
| L103G/N196H           | 98                   | >99:1        | 79 ( <i>S</i> )  |
| L103G/N196L           | 150                  | 97:3         | 49 ( <i>S</i> )  |
| L103G/N196M           | 165                  | 97:3         | 27 ( <i>S</i> )  |
| L103G/N196Q           | 42                   | 95:5         | 89 ( <i>S</i> )  |
| L103G/N196Y           | 28                   | 91:9         | 79 ( <i>S</i> )  |
| L103C/N196W           | 136                  | 97:3         | 79 ( <i>S</i> )  |
| L103D/N196W           | 187                  | 93:7         | 66 ( <i>S</i> )  |
| L103E/N196W           | 154                  | 97:3         | 57 ( <i>S</i> )  |

|             |     |       |        |
|-------------|-----|-------|--------|
| L103H/N196W | 145 | 93:7  | 73 (S) |
| L103M/N196W | 135 | 96:4  | 79 (S) |
| L103N/N196W | 143 | >99:1 | 76 (S) |
| L103Q/N196W | 156 | 97:3  | 76 (S) |
| L103S/N196W | 149 | >99:1 | 77 (S) |
| L103T/N196W | 146 | >99:1 | 70 (S) |
| L103Y/N196W | 112 | >99:1 | 82 (S) |
| L103A/N196W | 188 | 97:3  | 57 (S) |
| L103G/N196W | 84  | 98:2  | 90 (S) |
| I104H/N196W | 50  | 95:5  | 97 (S) |
| I104Y/N196W | 72  | 97:3  | 96 (S) |
| I104W/N196W | 87  | 99:1  | 91 (S) |
| I104V/N196W | 92  | 99:1  | 85 (S) |
| I104F/N196W | 73  | >99:1 | 98 (S) |
| I104C/N196W | 43  | 99:1  | 98 (S) |
| I104G/N196W | 56  | 98:2  | 95 (S) |

---

<sup>a</sup> Reactions were carried out in 1 mL Tris-SO<sub>4</sub> buffer (50 mM, pH 7.5) containing *E. coli* (HHDH) wet cells (50 g/L), 1% v/v DMSO, **1a** (10 mM) and NaOCN (15 mM) at 30 °C, 200 rpm for 3 h.

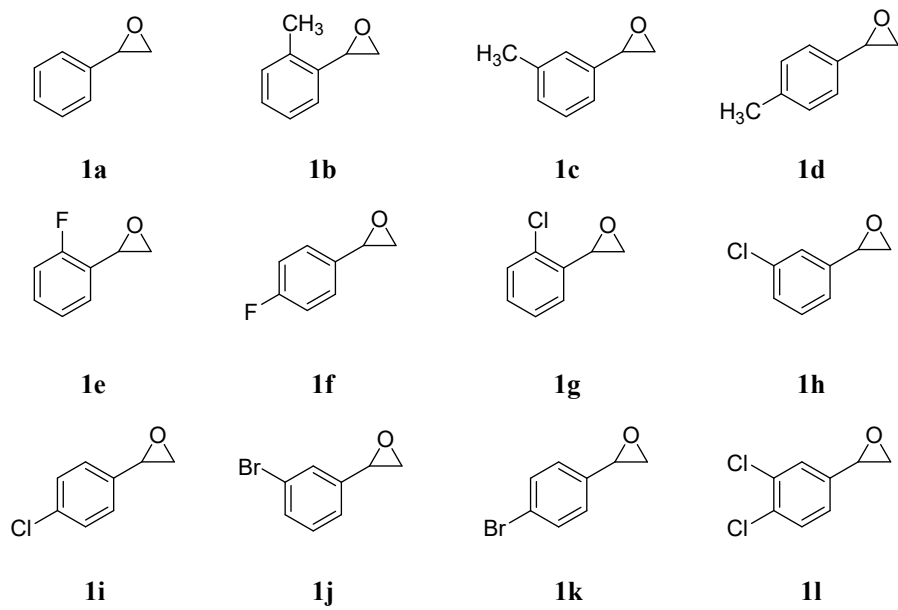

**Fig. S1** Epoxide used as substrates in this study.

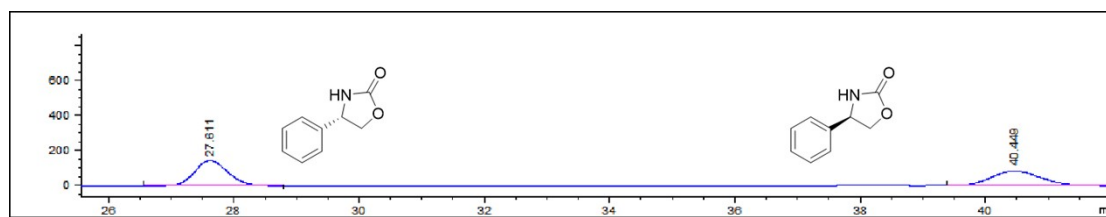

| ID# | Ret.Time | Area   | Height | Area % |
|-----|----------|--------|--------|--------|
| 1   | 27.611   | 5253.9 | 143.7  | 53.827 |
| 2   | 40.449   | 4506.8 | 83.9   | 46.173 |

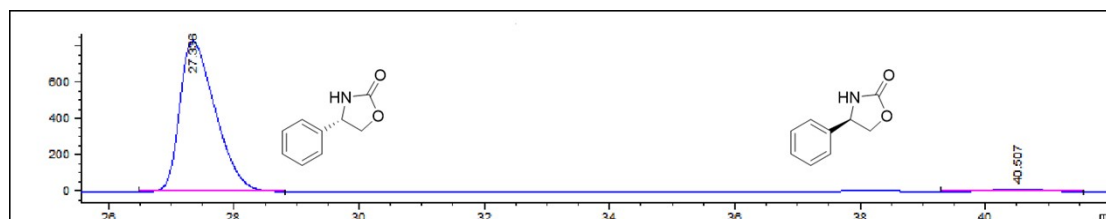

| ID# | Ret.Time | Area    | Height | Area % |
|-----|----------|---------|--------|--------|
| 1   | 27.336   | 32612.6 | 830.7  | 97.891 |
| 2   | 40.507   | 702.7   | 14.1   | 2.109  |

We established a large-scale biological reaction with epoxyethane **1a** (1.2g) as the substrate. The reaction was continued for 6 hours with a substrate concentration of 50mM. After treatment, the final yield was 38%(0.61g).

The *ee* was determined by chiral HPLC (Chiralpak IC, *n*-hexane/*i*-PrOH=80/20, flow rate 1 mL/min,  $\lambda$ =210 nm, *t*(*S*)-**2a**=27.3 min, *t*(*R*)-**2a** =40.5 min).

**Fig. S2** HPLC chromatograms of *rac*-**2a** synthesized by *IcHheG*, (*S*)-**2a** synthesized by mutant I104F/N196W.

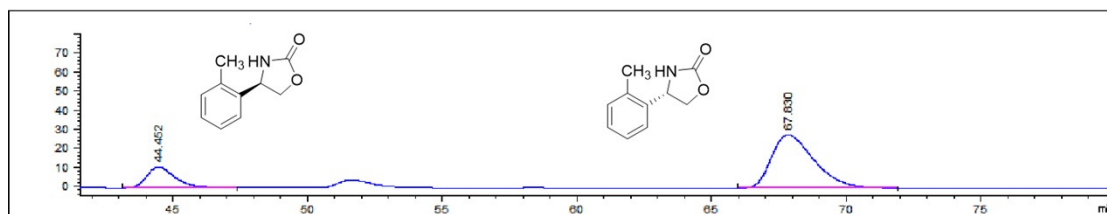

| ID# | Ret.Time | Area   | Height | Area % |
|-----|----------|--------|--------|--------|
| 1   | 44.452   | 797.7  | 10.9   | 20.492 |
| 2   | 67.83    | 3095.3 | 28     | 79.508 |

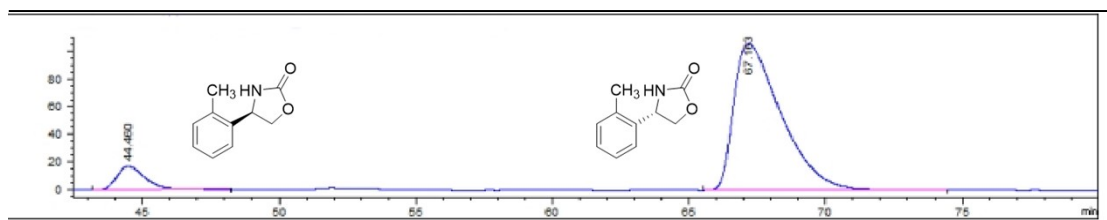

| ID# | Ret.Time | Area    | Height | Area % |
|-----|----------|---------|--------|--------|
| 1   | 44.46    | 1309.9  | 17.2   | 9.251  |
| 2   | 67.163   | 12849.6 | 106.2  | 90.749 |

The *ee* was determined by chiral HPLC (Chiralpak OD-H, *n*-hexane/*i*-PrOH = 90/10, flow rate 0.6 mL/min,  $\lambda = 220$  nm,  $t(S)\text{-2b} = 67.2$  min,  $t(R)\text{-2b} = 44.5$  min).

**Fig. S3** HPLC chromatograms of *rac*-**2b** synthesized by *IcHheG*, (*S*)-**2b** synthesized by mutant I104F/N196W.

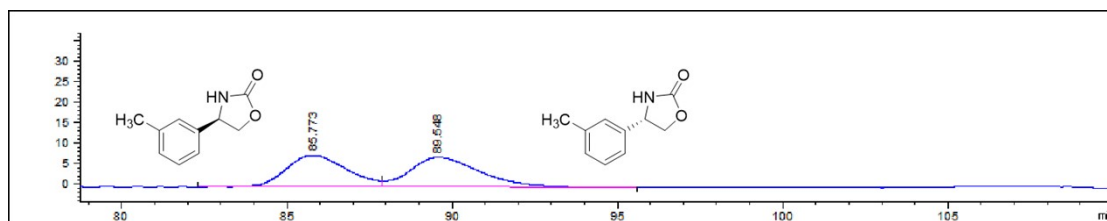

| ID# | Ret.Time | Area   | Height | Area % |
|-----|----------|--------|--------|--------|
| 1   | 85.773   | 1001.5 | 7.7    | 48.024 |
| 2   | 89.548   | 1083.9 | 7.3    | 51.976 |

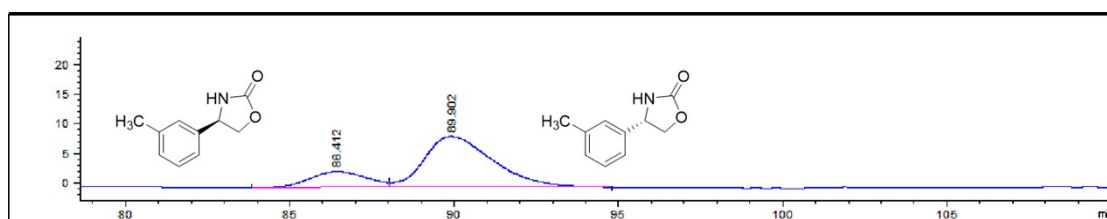

| ID# | Ret.Time | Area   | Height | Area % |
|-----|----------|--------|--------|--------|
| 1   | 86.413   | 343.7  | 2.8    | 20.985 |
| 2   | 89.901   | 1294.3 | 8.7    | 79.015 |

The *ee* was determined by chiral HPLC (Chiralpak OD-H, *n*-hexane/*i*-PrOH = 95/5, flow rate 0.6 mL/min,  $\lambda = 220$  nm,  $t(S)\text{-}2c = 89.9$  min,  $t(R)\text{-}2c = 86.4$  min).

**Fig. S4** HPLC chromatograms of *rac*-**2c** synthesized by *IcHheG*, (*S*)-**2c** synthesized by mutant I104F/N196W.

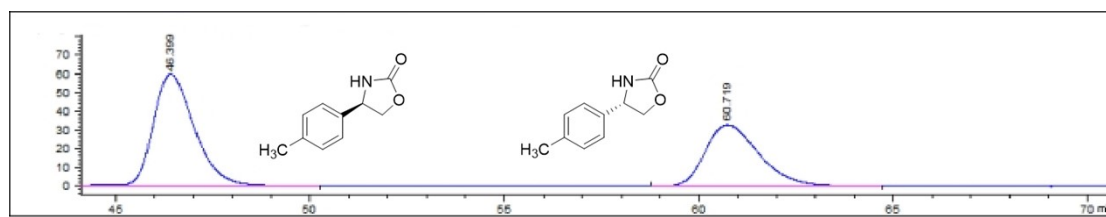

| ID# | Ret.Time | Area   | Height | Area % |
|-----|----------|--------|--------|--------|
| 1   | 46.399   | 4411.8 | 59.9   | 58.229 |
| 2   | 60.719   | 3164.8 | 32.8   | 41.771 |

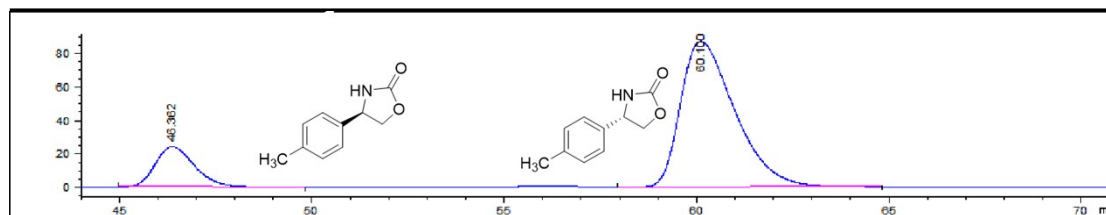

| ID# | Ret.Time | Area   | Height | Area % |
|-----|----------|--------|--------|--------|
| 1   | 46.362   | 1745.2 | 24.3   | 16.895 |
| 2   | 60.1     | 8584.5 | 87.3   | 83.105 |

The *ee* was determined by chiral HPLC (Chiralpak OD-H, *n*-hexane/*i*-PrOH = 90/10, flow rate 0.6 mL/min,  $\lambda = 220$  nm,  $t(S)\text{-2d} = 60.1$  min,  $t(R)\text{-2d} = 46.4$  min).

**Fig. S5** HPLC chromatograms of *rac*-**2d** synthesized by *IcHheG*, (*S*)-**2d** synthesized by mutant I104F/N196W.



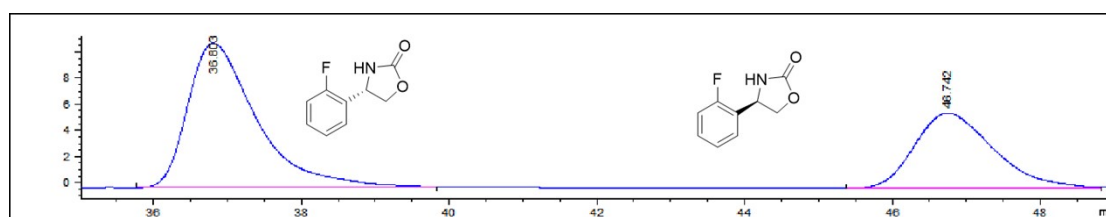

| ID# | Ret. Time | Area  | Height | Area % |
|-----|-----------|-------|--------|--------|
| 1   | 36.803    | 716.9 | 11.1   | 62.358 |
| 2   | 46.742    | 432.7 | 5.8    | 37.642 |

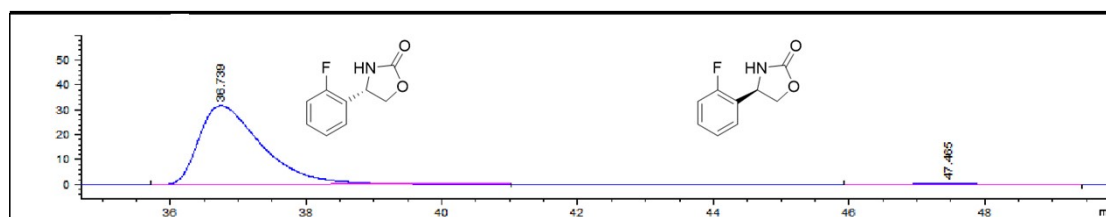

| ID# | Ret. Time | Area   | Height | Area % |
|-----|-----------|--------|--------|--------|
| 1   | 36.739    | 2085.7 | 31.8   | 98.698 |
| 2   | 47.457    | 27.5   | 3.8E-1 | 1.302  |

The *ee* was determined by chiral HPLC (Chiralpak OD-H, *n*-hexane/*i*-PrOH = 90/10, flow rate 0.6 mL/min,  $\lambda = 220$  nm,  $t(S)\text{-}2e = 36.7$  min,  $t(R)\text{-}2e = 47.5$  min).

**Fig. S6** HPLC chromatograms of *rac*-**2e** synthesized by *IcHheG*, (*S*)-**2e** synthesized by mutant I104F/N196W.

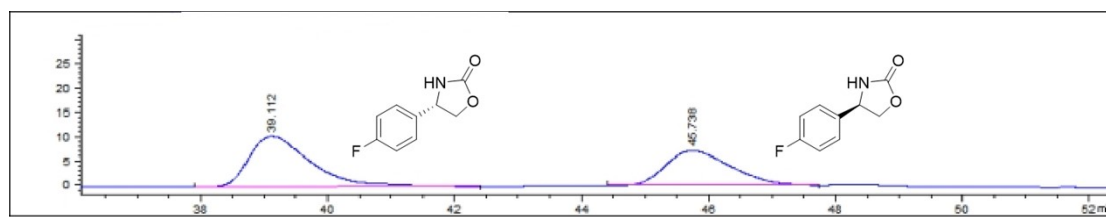

| ID# | Ret.Time | Area  | Height | Area % |
|-----|----------|-------|--------|--------|
| 1   | 39.112   | 718.1 | 10.5   | 58.221 |
| 2   | 45.738   | 515.3 | 7.2    | 41.779 |

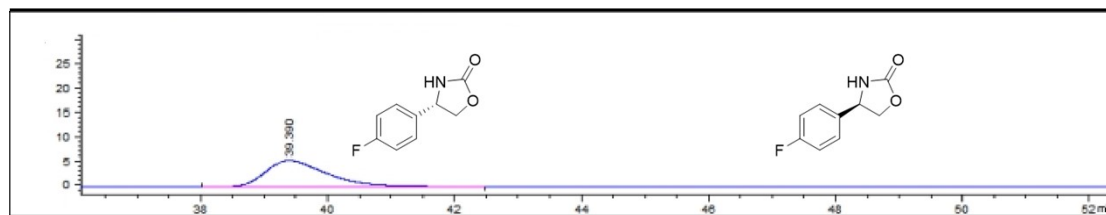

| ID# | Ret.Time | Area  | Height | Area % |
|-----|----------|-------|--------|--------|
| 1   | 39.39    | 376.9 | 5.5    | 100    |

The *ee* was determined by chiral HPLC (Chiralpak OD-H, *n*-hexane/*i*-PrOH = 90/10, flow rate 0.6 mL/min,  $\lambda = 220$  nm,  $t(S)\text{-2f} = 39.4$  min,  $t(R)\text{-2f} = 45.7$  min).

**Fig. S7** HPLC chromatograms of *rac*-**2f** synthesized by *IcHheG*, (*S*)-**2f** synthesized by mutant I104F/N196W.

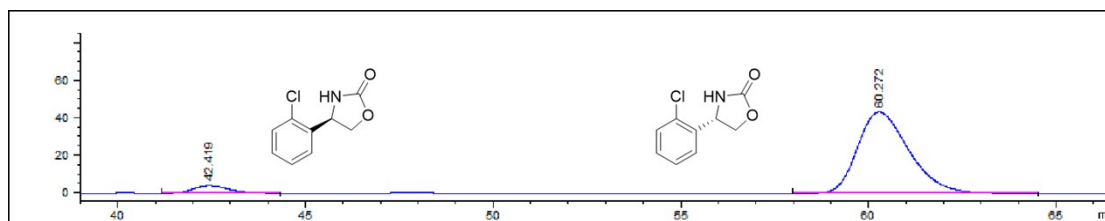

| ID# | Ret.Time | Area   | Height | Area % |
|-----|----------|--------|--------|--------|
| 1   | 42.419   | 270.2  | 4      | 6.074  |
| 2   | 60.272   | 4178.8 | 43.5   | 93.926 |

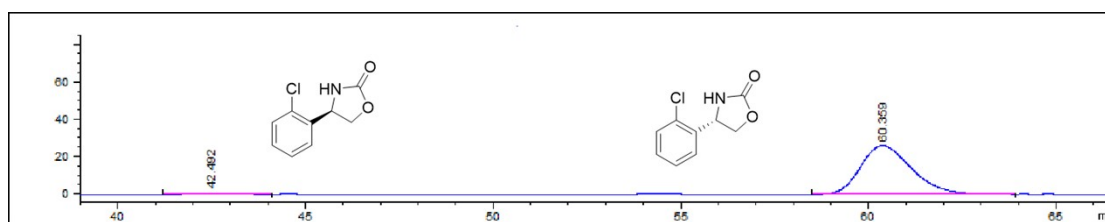

| ID# | Ret.Time | Area   | Height | Area % |
|-----|----------|--------|--------|--------|
| 1   | 42.492   | 29.5   | 4.4E-1 | 1.183  |
| 2   | 60.359   | 2462.7 | 26.1   | 98.817 |

The *ee* was determined by chiral HPLC (Chiralpak OD-H, *n*-hexane/*i*-PrOH = 90/10, flow rate 0.6 mL/min,  $\lambda = 220$  nm,  $t(S)\text{-2g} = 42.5$  min,  $t(R)\text{-2g} = 60.4$  min).

**Fig. S8** HPLC chromatograms of *rac*-**2g** synthesized by *IcHheG*, (*S*)-**2g** synthesized by mutant I104F/N196W.

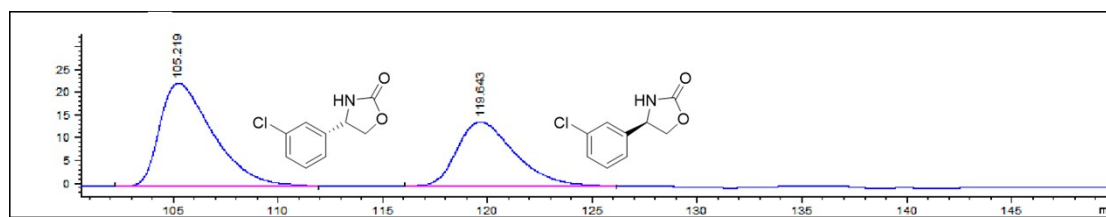

| ID# | Ret.Time | Area   | Height | Area % |
|-----|----------|--------|--------|--------|
| 1   | 105.219  | 3992.6 | 22.5   | 59.527 |
| 2   | 119.643  | 2714.6 | 14.2   | 40.473 |

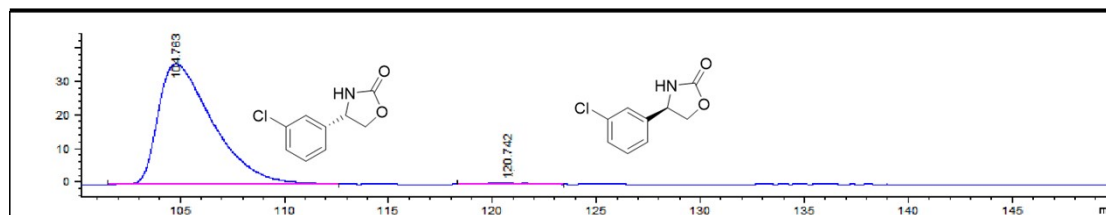

| ID# | Ret.Time | Area   | Height | Area % |
|-----|----------|--------|--------|--------|
| 1   | 104.763  | 6584.1 | 36     | 98.821 |
| 2   | 120.742  | 78.6   | 4.8E-1 | 1.179  |

The *ee* was determined by chiral HPLC (Chiralpak OD-H, *n*-hexane/*i*-PrOH = 95/5, flow rate 0.6 mL/min,  $\lambda = 220$  nm, *t*(*S*)-**2h**= 104.8 min, *t*(*R*)-**2h**= 120.7 min).

**Fig. S9** HPLC chromatograms of *rac*-**2h** synthesized by *IcHheG*, (*S*)-**2h** synthesized by mutant I104F/N196W.

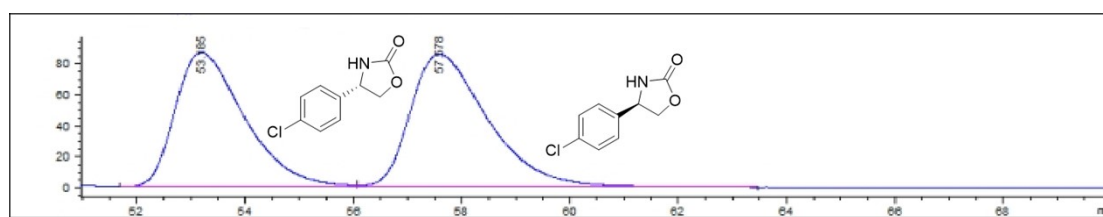

| ID# | Ret. Time | Area   | Height | Area % |
|-----|-----------|--------|--------|--------|
| 1   | 53.185    | 7820.1 | 87     | 47.588 |
| 2   | 57.578    | 8613   | 86     | 52.412 |

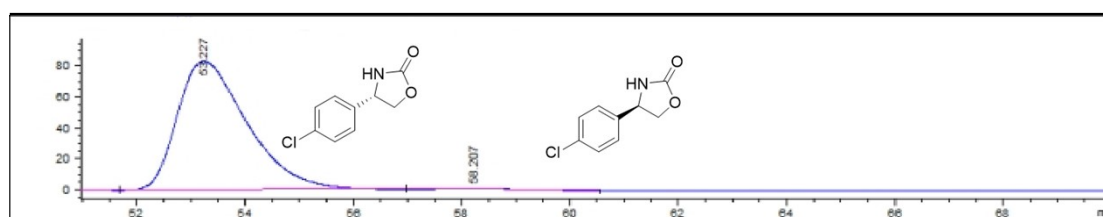

| ID# | Ret. Time | Area   | Height | Area % |
|-----|-----------|--------|--------|--------|
| 1   | 53.227    | 7531.5 | 83.5   | 98.822 |
| 2   | 58.207    | 89.8   | 1.1    | 1.178  |

The *ee* was determined by chiral HPLC (Chiralpak OD-H, *n*-hexane/*i*-PrOH = 90/10, flow rate 0.6 mL/min,  $\lambda = 220$  nm,  $t(S)\text{-2i} = 53.2$  min,  $t(R)\text{-2i} = 58.2$  min).

**Fig. S10** HPLC chromatograms of *rac*-**2i** synthesized by *IcHheG*, (*S*)-**2i** synthesized by mutant I104F/N196W.

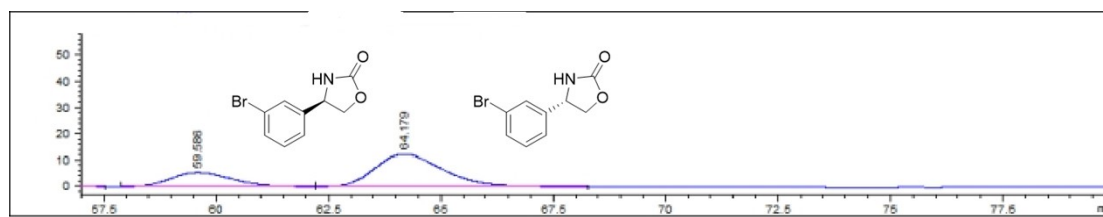

| ID# | Ret. Time | Area   | Height | Area % |
|-----|-----------|--------|--------|--------|
| 1   | 59.586    | 510.5  | 5.4    | 28.061 |
| 2   | 64.179    | 1308.9 | 12.5   | 71.939 |

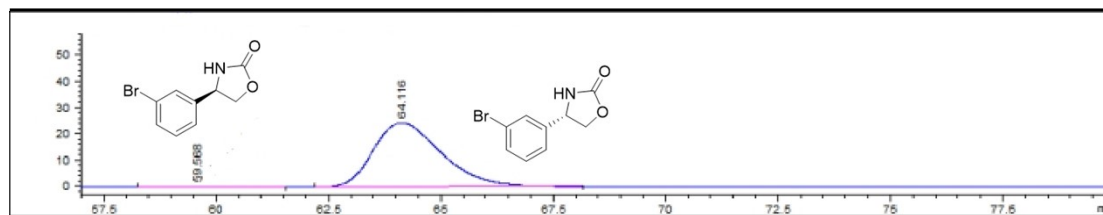

| ID# | Ret. Time | Area   | Height | Area % |
|-----|-----------|--------|--------|--------|
| 1   | 59.568    | 29.5   | 3E-1   | 1.112  |
| 2   | 64.116    | 2619.7 | 24.6   | 98.888 |

The *ee* was determined by chiral HPLC (Chiralpak OD-H, *n*-hexane/*i*-PrOH = 90/10, flow rate 0.6 mL/min,  $\lambda = 220$  nm,  $t(S)\text{-2j} = 64.1$  min,  $t(R)\text{-2j} = 59.6$  min).

**Fig. S11** HPLC chromatograms of *rac*-**2j** synthesized by *IcHheG*, (*S*)-**2j** synthesized by mutant I104F/N196W.

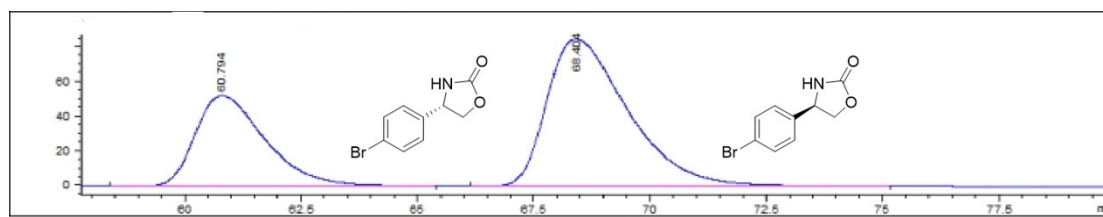

| ID# | Ret.Time | Area    | Height | Area % |
|-----|----------|---------|--------|--------|
| 1   | 60.794   | 5470.3  | 52.2   | 34.679 |
| 2   | 68.404   | 10303.9 | 85.1   | 65.321 |

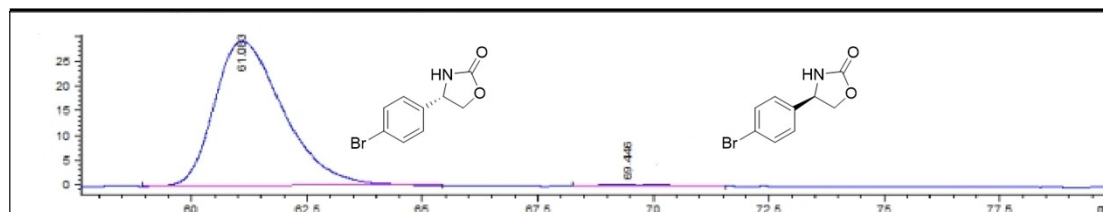

| ID# | Ret.Time | Area   | Height | Area % |
|-----|----------|--------|--------|--------|
| 1   | 61.083   | 3060.2 | 29.3   | 98.995 |
| 2   | 69.446   | 31.1   | 3.7E-1 | 1.005  |

The *ee* was determined by chiral HPLC (Chiralpak OD-H, *n*-hexane/*i*-PrOH = 90/10, flow rate 0.6 mL/min,  $\lambda = 220$  nm,  $t(S)\text{-2k} = 61.1$  min,  $t(R)\text{-2k} = 69.4$  min).

**Fig. S12** HPLC chromatograms of *rac*-**2k** synthesized by *IcHheG*, (*S*)-**2k** synthesized by mutant I104F/N196W.

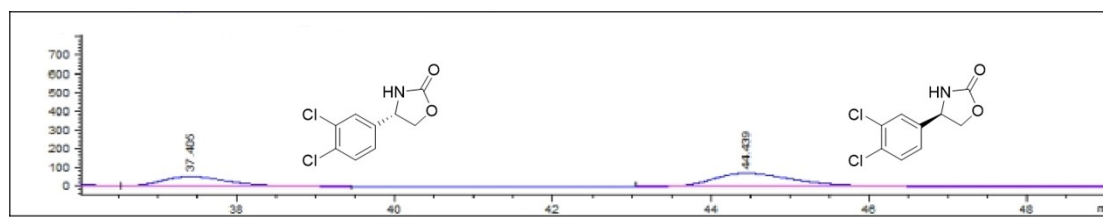

| ID# | Ret. Time | Area   | Height | Area % |
|-----|-----------|--------|--------|--------|
| 1   | 37.405    | 3150.7 | 53.4   | 37.658 |
| 2   | 44.439    | 5215.9 | 71.8   | 62.342 |

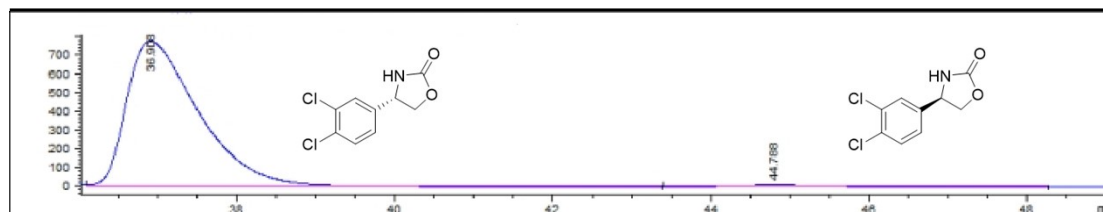

| ID# | Ret. Time | Area    | Height | Area % |
|-----|-----------|---------|--------|--------|
| 1   | 36.908    | 49696.2 | 778.5  | 98.625 |
| 2   | 44.788    | 692.8   | 9.5    | 1.375  |

The *ee* was determined by chiral HPLC (Chiralpak OD-H, *n*-hexane/*i*-PrOH = 80/20, flow rate 0.4 mL/min,  $\lambda = 220$  nm,  $t(S)\text{-21} = 36.9$ min,  $t(R)\text{-21} = 44.8$  min).

**Fig. S13** HPLC chromatograms of *rac*-**21** synthesized by *IcHheG*, (*S*)-**21** synthesized by mutant I104F/N196W.



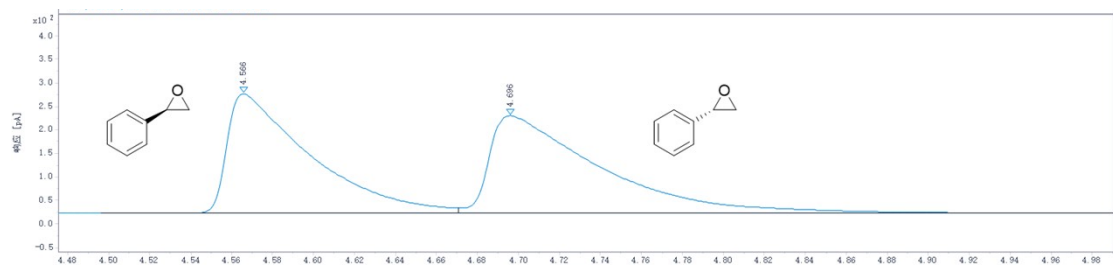

| ID # | RT (min) | Area % | Area (pA·s) | Height (pA) |
|------|----------|--------|-------------|-------------|
| 1    | 4.566    | 47.877 | 713.357     | 253.697     |
| 2    | 4.696    | 52.123 | 776.625     | 207.428     |

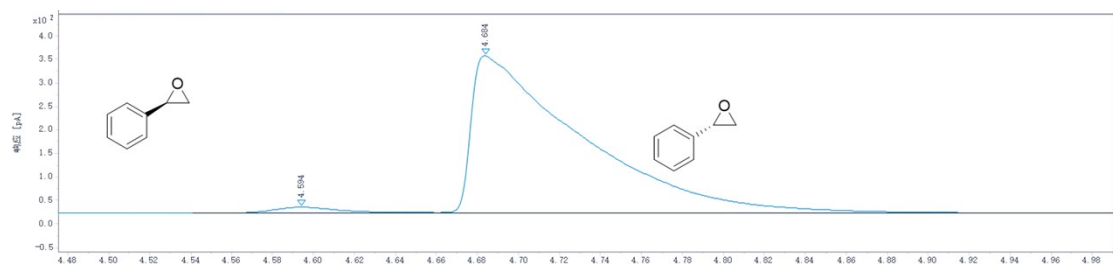

| ID # | RT (min) | Area % | Area (pA·s) | Height (pA) |
|------|----------|--------|-------------|-------------|
| 1    | 4.594    | 2.387  | 30.730      | 12.527      |
| 2    | 4.684    | 97.613 | 1256.631    | 334.609     |

The detection method is as follows: start at 100 °C, increase at 5 °C/min to 180 °C, and hold at 10 °C/min increase to 220 °C for 8 minutes.

**Fig. S14** Chiral GC chromatograms of *rac-1a*; Chiral GC chromatogram analysis of biotransformation of *rac-1a* by mutant I104F/N196W.

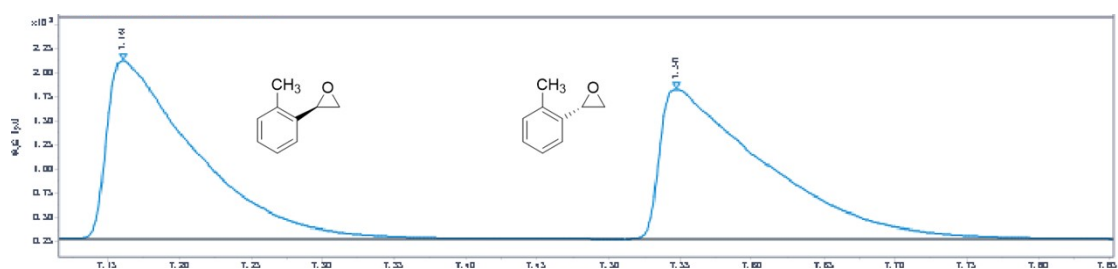

| ID # | RT (min) | Area % | Area (pA·s) | Height (pA) |
|------|----------|--------|-------------|-------------|
| 1    | 7.161    | 49.967 | 799.388     | 185.014     |
| 2    | 7.547    | 50.033 | 800.440     | 155.289     |

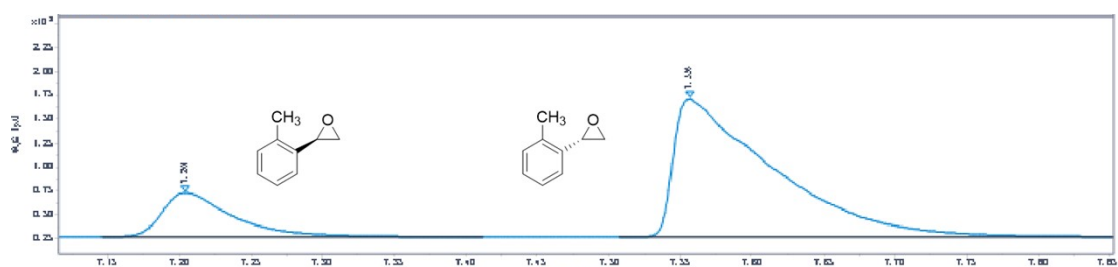

| ID # | RT (min) | Area % | Area (pA·s) | Height (pA) |
|------|----------|--------|-------------|-------------|
| 1    | 7.204    | 18.762 | 161.283     | 46.295      |
| 2    | 7.556    | 81.238 | 698.364     | 144.572     |

The detection method is as follows: start at 100 °C, increase at 3 °C/min to 180 °C, and hold at 10 °C/min increase to 220 °C for 8 minutes.

**Fig. S15** Chiral GC chromatograms of *rac-1b*; Chiral GC chromatogram analysis of biotransformation of *rac-1b* by mutant I104F/N196W.

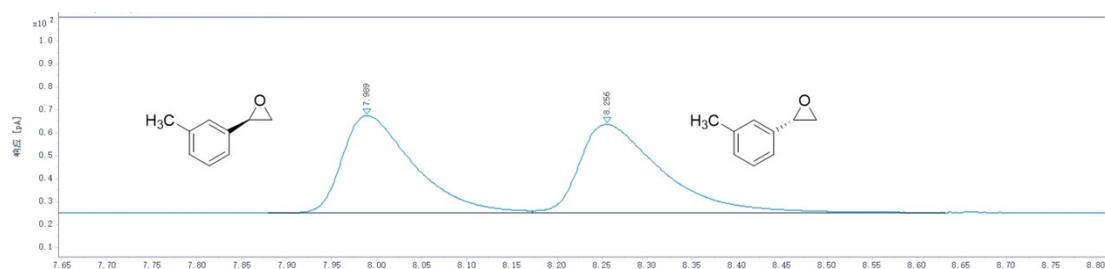

| ID # | RT (min) | Area % | Area (pA·s) | Height (pA) |
|------|----------|--------|-------------|-------------|
| 1    | 7.989    | 48.897 | 232.551     | 42.449      |
| 2    | 8.256    | 51.103 | 243.046     | 38.559      |

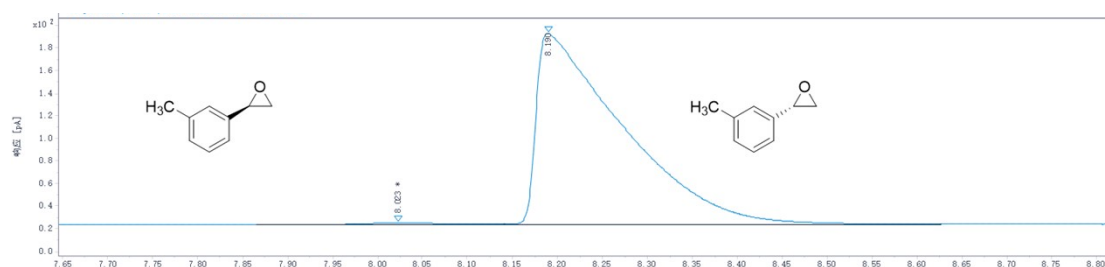

| ID # | RT (min) | Area % | Area (pA·s) | Height (pA) |
|------|----------|--------|-------------|-------------|
| 1    | 8.023    | 0.726  | 8.265       | 1.502       |
| 2    | 8.190    | 99.274 | 1130.286    | 169.295     |

The detection method is as follows: start at 100 °C, increase at 1 °C/min to 160 °C, and hold at 20 °C/min increase to 220 °C for 8 minutes.

**Fig. S16** Chiral GC chromatograms of *rac-1c*; Chiral GC chromatogram analysis of biotransformation of *rac-1c* by mutant I104F/N196W.

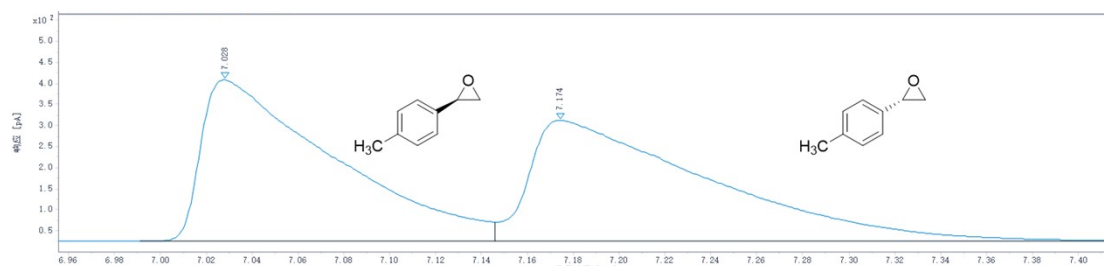

| ID # | RT (min) | Area % | Area (pA·s) | Height (pA) |
|------|----------|--------|-------------|-------------|
| 1    | 7.028    | 49.569 | 1534.727    | 383.411     |
| 2    | 7.174    | 50.431 | 1561.407    | 286.935     |

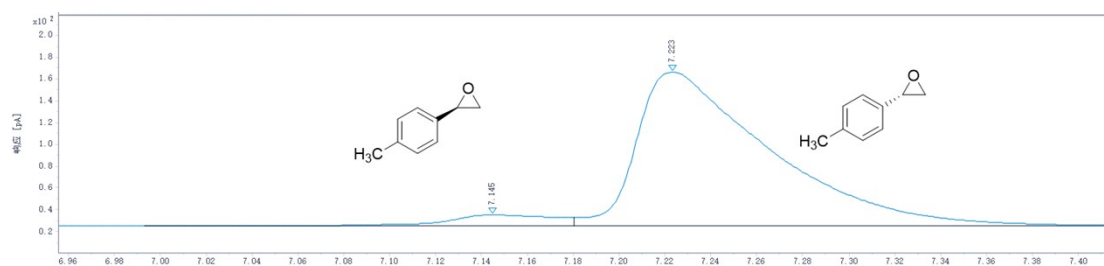

| ID # | RT (min) | Area % | Area (pA·s) | Height (pA) |
|------|----------|--------|-------------|-------------|
| 1    | 7.145    | 5.733  | 35.165      | 10.374      |
| 2    | 7.223    | 94.267 | 578.176     | 141.498     |

The detection method is as follows: start at 100 °C, increase at 3 °C/min to 180 °C, and hold at 10 °C/min increase to 220 °C for 8 minutes.

**Fig. S17** Chiral GC chromatograms of *rac-1d*; Chiral GC chromatogram analysis of biotransformation of *rac-1d* by mutant I104F/N196W.

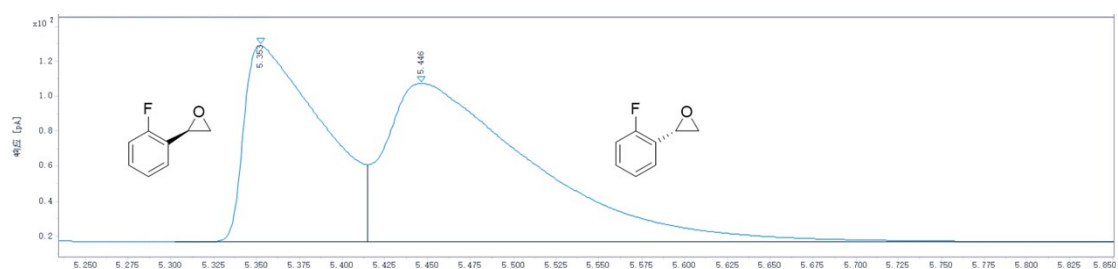

| ID # | RT (min) | Area % | Area (pA·s) | Height (pA) |
|------|----------|--------|-------------|-------------|
| 1    | 5.353    | 39.522 | 357.518     | 112.202     |
| 2    | 5.446    | 60.478 | 547.085     | 90.513      |

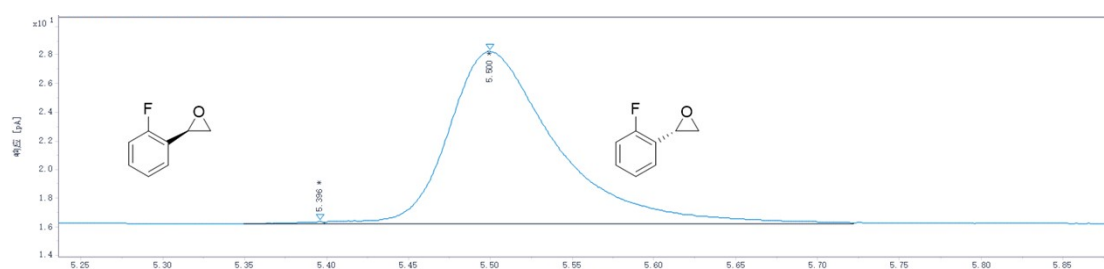

| ID # | RT (min) | Area % | Area (pA·s) | Height (pA) |
|------|----------|--------|-------------|-------------|
| 1    | 5.396    | 1.708  | 0.950       | 0.560       |
| 2    | 5.500    | 98.292 | 54.646      | 12.044      |

The detection method is as follows: start at 100 °C, increase at 0.5 °C/min to 115 °C, and hold at 10 °C/min increase to 220 °C for 8 minutes.

**Fig. S18** Chiral GC chromatograms of *rac-1e*; Chiral GC chromatogram analysis of biotransformation of *rac-1e* by mutant I104F/N196W.

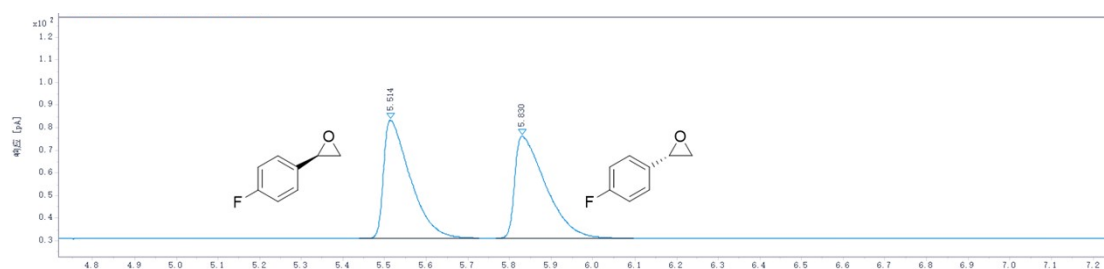

| ID # | RT (min) | Area % | Area (pA·s) | Height (pA) |
|------|----------|--------|-------------|-------------|
| 1    | 5.514    | 50.059 | 233.076     | 52.329      |
| 2    | 5.830    | 49.941 | 232.529     | 45.216      |

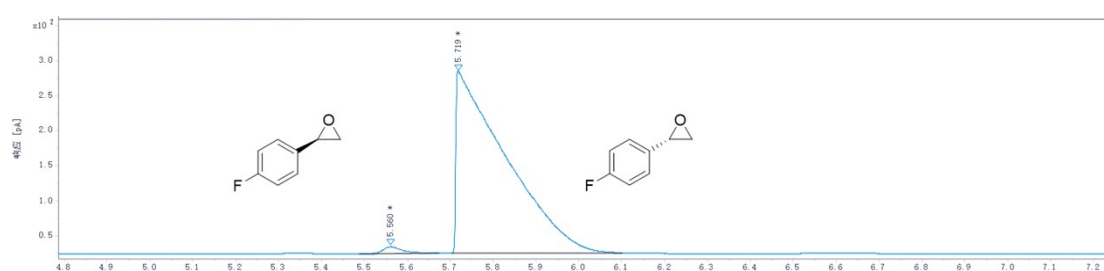

| ID # | RT (min) | Area % | Area (pA·s) | Height (pA) |
|------|----------|--------|-------------|-------------|
| 1    | 5.560    | 1.465  | 31.284      | 9.879       |
| 2    | 5.719    | 98.535 | 2103.844    | 259.444     |

The detection method is as follows: start at 100 °C, increase at 5 °C/min to 180 °C, and hold at 10 °C/min increase to 220 °C for 8 minutes.

**Fig. S19** Chiral GC chromatograms of *rac-1f*; Chiral GC chromatogram analysis of biotransformation of *rac-1f* by mutant I104F/N196W.

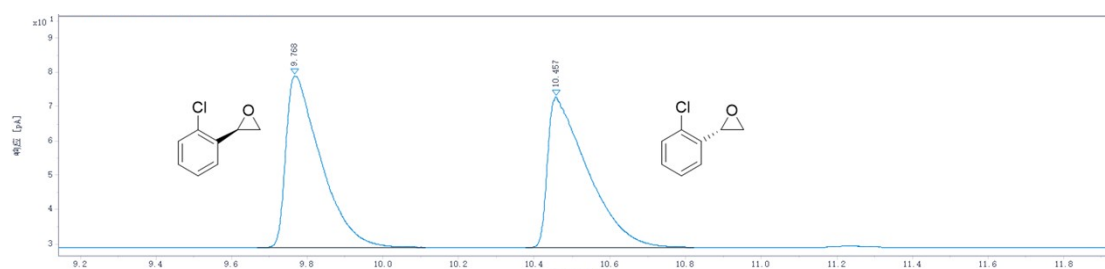

| ID # | RT (min) | Area % | Area (pA·s) | Height (pA) |
|------|----------|--------|-------------|-------------|
| 1    | 9.768    | 50.066 | 322.484     | 50.067      |
| 2    | 10.457   | 49.934 | 321.634     | 43.985      |

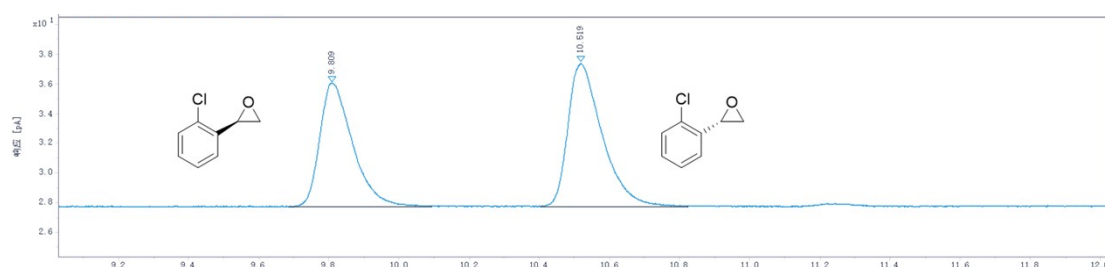

| ID # | RT (min) | Area % | Area (pA·s) | Height (pA) |
|------|----------|--------|-------------|-------------|
| 1    | 9.809    | 45.413 | 54.530      | 8.337       |
| 2    | 10.519   | 54.587 | 65.546      | 9.648       |

The detection method is as follows: start at 100 °C, increase at 1 °C/min to 160 °C, and hold at 20 °C/min increase to 220 °C for 8 minutes.

**Fig. S20** Chiral GC chromatograms of *rac-1g*; Chiral GC chromatogram analysis of biotransformation of *rac-1g* by mutant I104F/N196W.

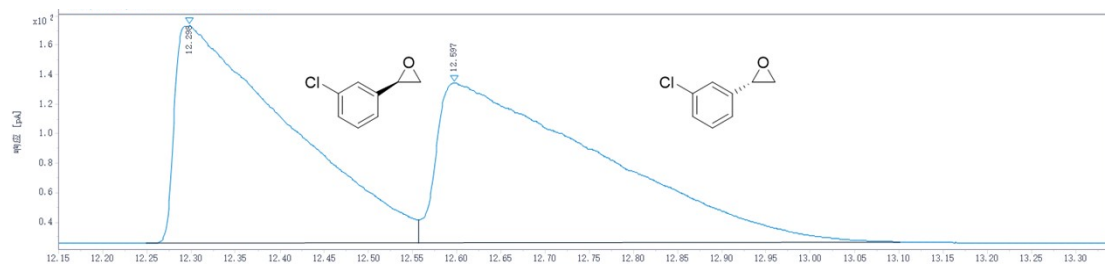

| ID # | RT (min) | Area % | Area (pA·s) | Height (pA) |
|------|----------|--------|-------------|-------------|
| 1    | 12.298   | 48.601 | 1323.352    | 147.667     |
| 2    | 12.597   | 51.399 | 1399.521    | 108.570     |

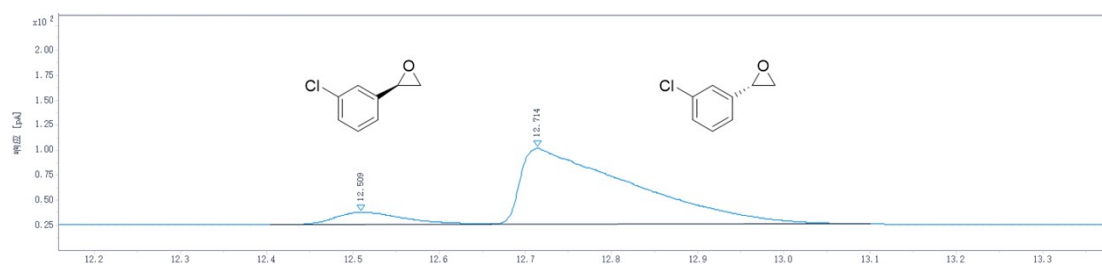

| ID # | RT (min) | Area % | Area (pA·s) | Height (pA) |
|------|----------|--------|-------------|-------------|
| 1    | 12.509   | 9.238  | 69.578      | 12.365      |
| 2    | 12.714   | 90.762 | 683.581     | 75.855      |

The detection method is as follows: start at 100 °C, increase at 5 °C/min to 180 °C, and hold at 10 °C/min increase to 220 °C for 8 minutes.

**Fig. S21** Chiral GC chromatograms of *rac-1h*; Chiral GC chromatogram analysis of biotransformation of *rac-1h* by mutant I104F/N196W.



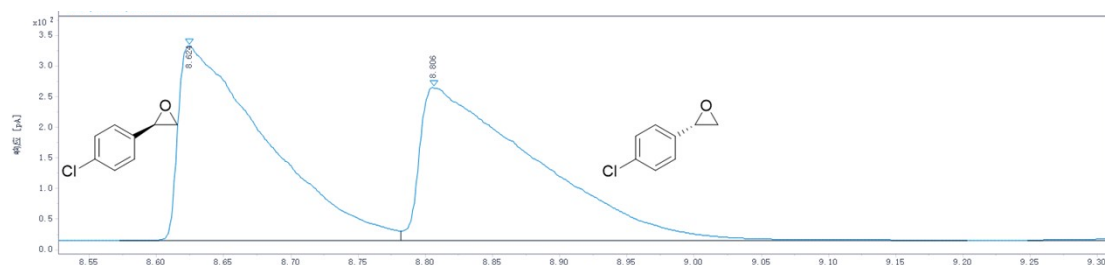

| ID # | RT (min) | Area % | Area (pA·s) | Height (pA) |
|------|----------|--------|-------------|-------------|
| 1    | 8.624    | 49.342 | 1439.877    | 318.291     |
| 2    | 8.806    | 50.658 | 1478.257    | 249.414     |

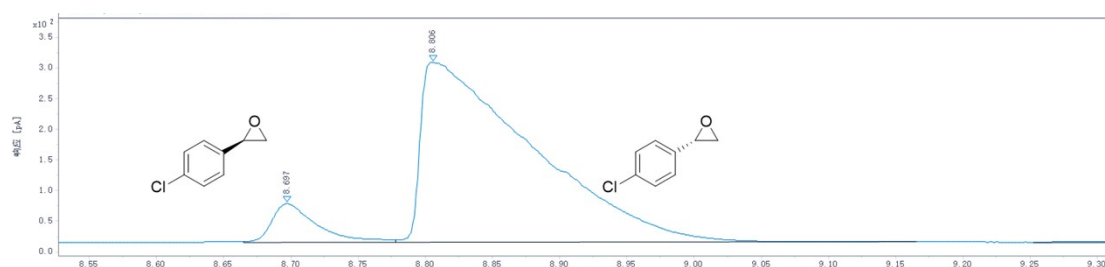

| ID # | RT (min) | Area % | Area (pA·s) | Height (pA) |
|------|----------|--------|-------------|-------------|
| 1    | 8.697    | 7.865  | 145.538     | 62.876      |
| 2    | 8.806    | 92.135 | 1704.952    | 293.672     |

The detection method is as follows: start at 100°C, increase at 2°C/min to 180 °C, and hold at 20 °C/min increase to 220 °C for 8 minutes.

**Fig. S22** Chiral GC chromatograms of *rac-1i*; Chiral GC chromatogram analysis of biotransformation of *rac-1i* by mutant I104F/N196W.

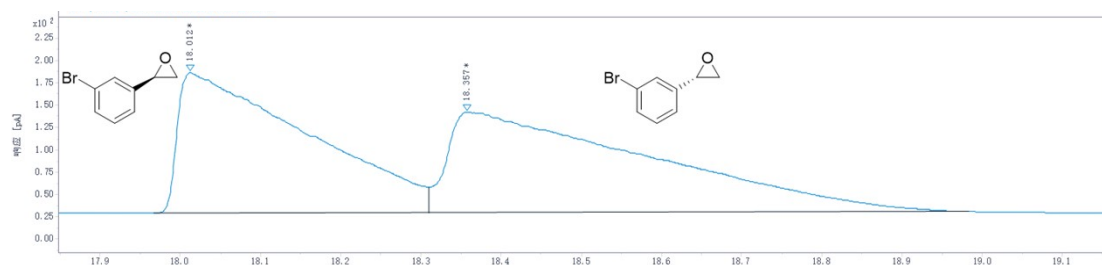

| ID # | RT (min) | Area % | Area (pA·s) | Height (pA) |
|------|----------|--------|-------------|-------------|
| 1    | 18.012   | 47.343 | 1773.425    | 157.664     |
| 2    | 18.357   | 52.657 | 1972.465    | 112.689     |

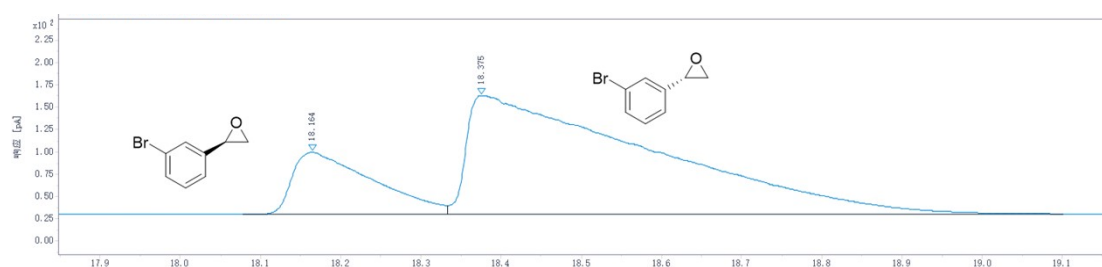

| ID # | RT (min) | Area % | Area (pA·s) | Height (pA) |
|------|----------|--------|-------------|-------------|
| 1    | 18.164   | 18.576 | 487.419     | 69.778      |
| 2    | 18.375   | 81.424 | 2136.539    | 133.119     |

The detection method is as follows: start at 100 °C, increase at 1 °C/min to 160 °C, and hold at 20 °C/min increase to 220 °C for 8 minutes.

**Fig. S23** Chiral GC chromatograms of *rac-1j*; Chiral GC chromatogram analysis of biotransformation of *rac-1j* by mutant I104F/N196W.

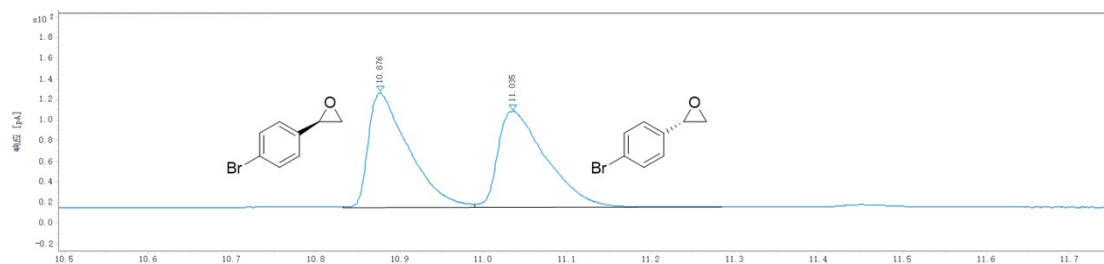

| ID # | RT (min) | Area % | Area (pA·s) | Height (pA) |
|------|----------|--------|-------------|-------------|
| 1    | 10.876   | 49.870 | 368.406     | 110.566     |
| 2    | 11.035   | 50.130 | 370.406     | 92.998      |

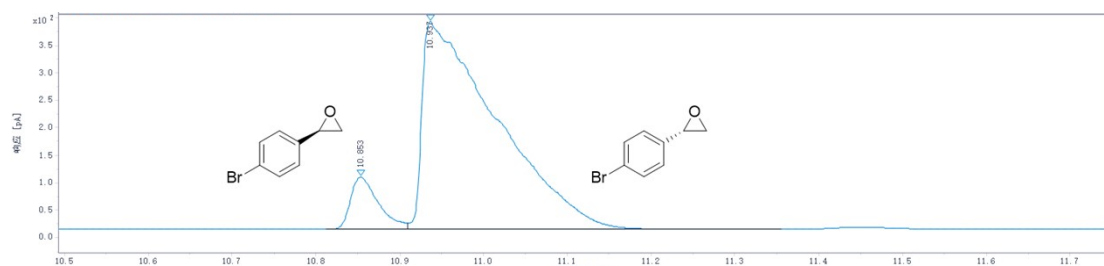

| ID # | RT (min) | Area % | Area (pA·s) | Height (pA) |
|------|----------|--------|-------------|-------------|
| 1    | 10.853   | 8.619  | 219.867     | 95.091      |
| 2    | 10.937   | 91.381 | 2330.995    | 377.454     |

The detection method is as follows: start at 100 °C, increase at 5 °C/min to 180 °C, and hold at 10 °C/min increase to 220 °C for 8 minutes.

**Fig. S24** Chiral GC chromatograms of *rac-1k*; Chiral GC chromatogram analysis of biotransformation of *rac-1k* by mutant I104F/N196W.

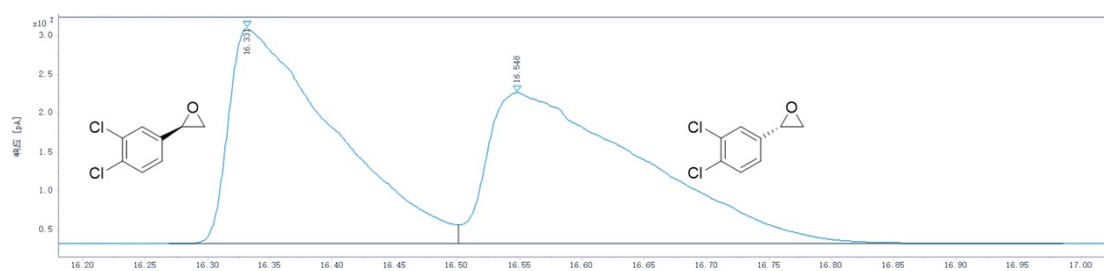

| ID # | RT (min) | Area % | Area (pA·s) | Height (pA) |
|------|----------|--------|-------------|-------------|
| 1    | 16.331   | 49.073 | 1620.512    | 277.498     |
| 2    | 16.548   | 50.927 | 1681.705    | 194.873     |

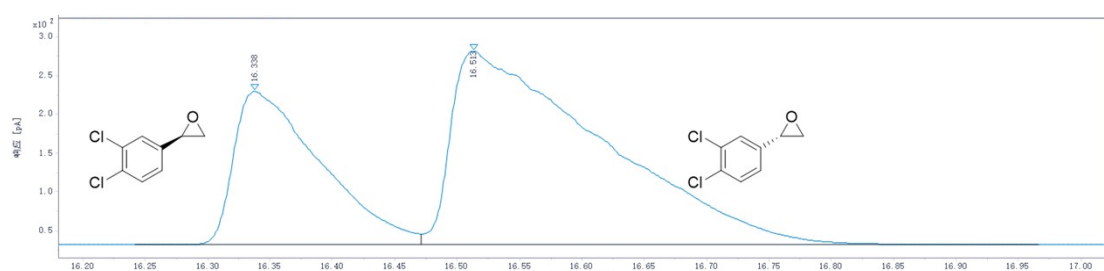

| ID # | RT (min) | Area % | Area (pA·s) | Height (pA) |
|------|----------|--------|-------------|-------------|
| 1    | 16.338   | 31.297 | 958.400     | 197.501     |
| 2    | 16.513   | 68.703 | 2103.826    | 249.580     |

The detection method is as follows: start at 100 °C, increase at 3 °C/min to 180 °C, and hold at 10 °C/min increase to 220 °C for 8 minutes.

**Fig. S25** Chiral GC chromatograms of *rac*-**11**; Chiral GC chromatogram analysis of biotransformation of *rac*-**11** by mutant I104F/N196W.

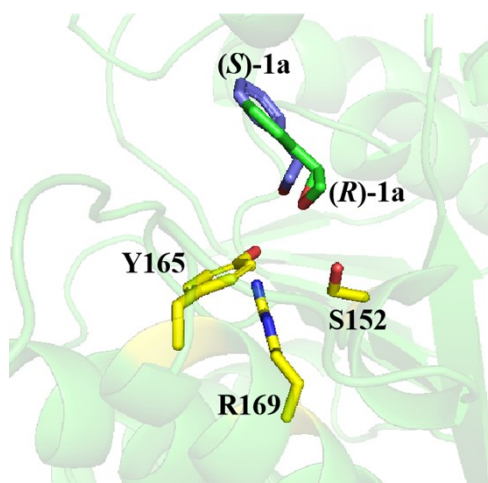

**Fig. S26** Docking analysis of *IcHheG* with **1a**.

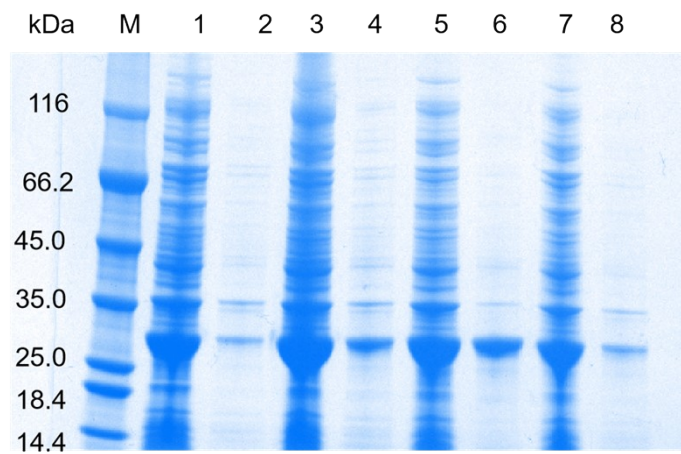

**Fig. S27** SDS-PAGE analysis of overexpression of the recombinant *E. coli* (*IcHheG*) and its mutants. Lane M: protein marker; Lane **1**: the supernatant of *E. coli* (*IcHheG*); Lane **2**: the deposit of *E. coli* (*IcHheG*); Lane **3**: the supernatant of *E. coli* (N196W); Lane **4**: the deposit of *E. coli* (N196W); Lane **5**: the supernatant of *E. coli* (L103G); Lane **6**: the deposit of *E. coli* (L103G); Lane **7**: the supernatant of *E. coli* (I104F/N196W); Lane **8**: the deposit of *E. coli* (I104F/N196W).

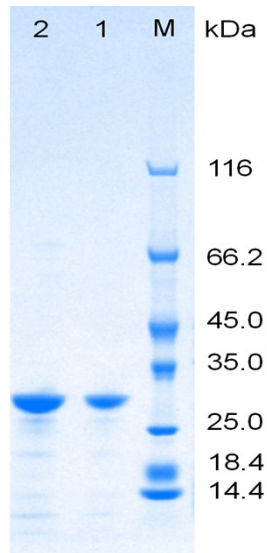

**Fig. S28** SDS-PAGE analysis of the purification of *IcHheG* and mutant I104F/N196W. Lane M: protein marker; Lane 1: purified mutant I104F/N196W; Lane 2: purified *IcHheG*.

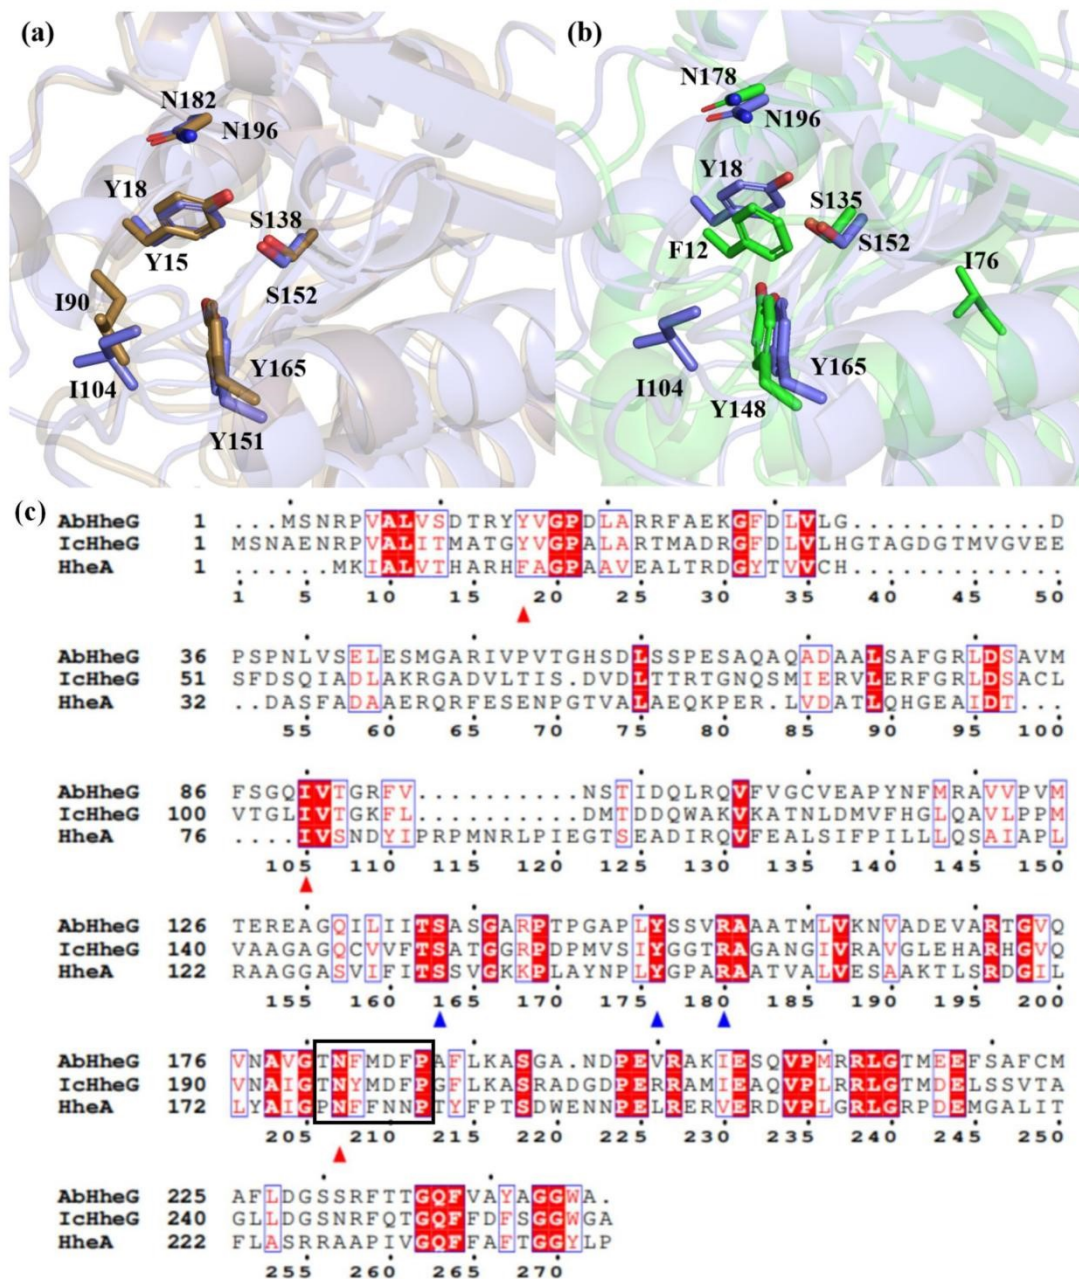

Fig. S29: a: Structural comparison of *AbHheG* (sand) with *IcHheG* (deepblue). b: Structural comparison of *HheA* (green) with *IcHheG* (deep blue). c: Protein sequence alignment of *IcHheG*, *AbHheG* and *HheA*. Halide binding sites are marked with black box. The catalytic triad are marked by blue triangles. Residues 18 (*IcHheG*), 15 (*AbHheG*) and 12 (*HheA*) are marked by red triangle. Residues 104 (*IcHheG*), 90 (*AbHheG*) and 76 (*HheA*) are marked by red triangle. Residues 196 (*IcHheG*), 182 (*AbHheG*) and 178 (*HheA*) are marked by red triangle.



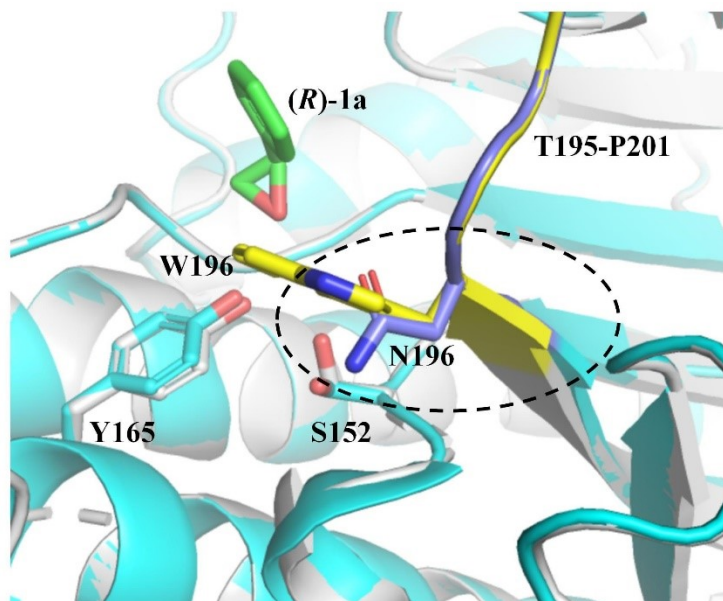

**Fig. S30** Structural comparison of WT *IcHheG* (cyan) with mutant I104F/N196W (grey). Halide binding loop in WT *IcHheG* (Residues 195-201) is marked with deepblue. Halide binding loop in mutant I104F/N196W (Residues 195-201) is marked with yellow.

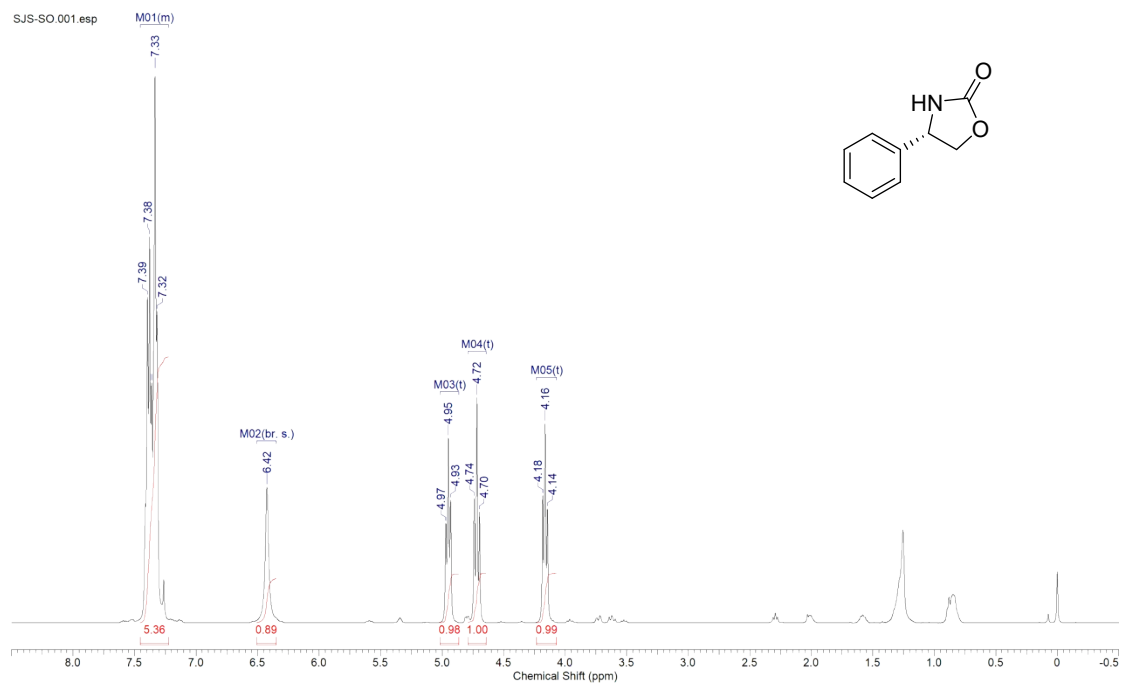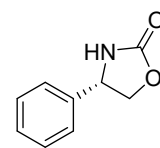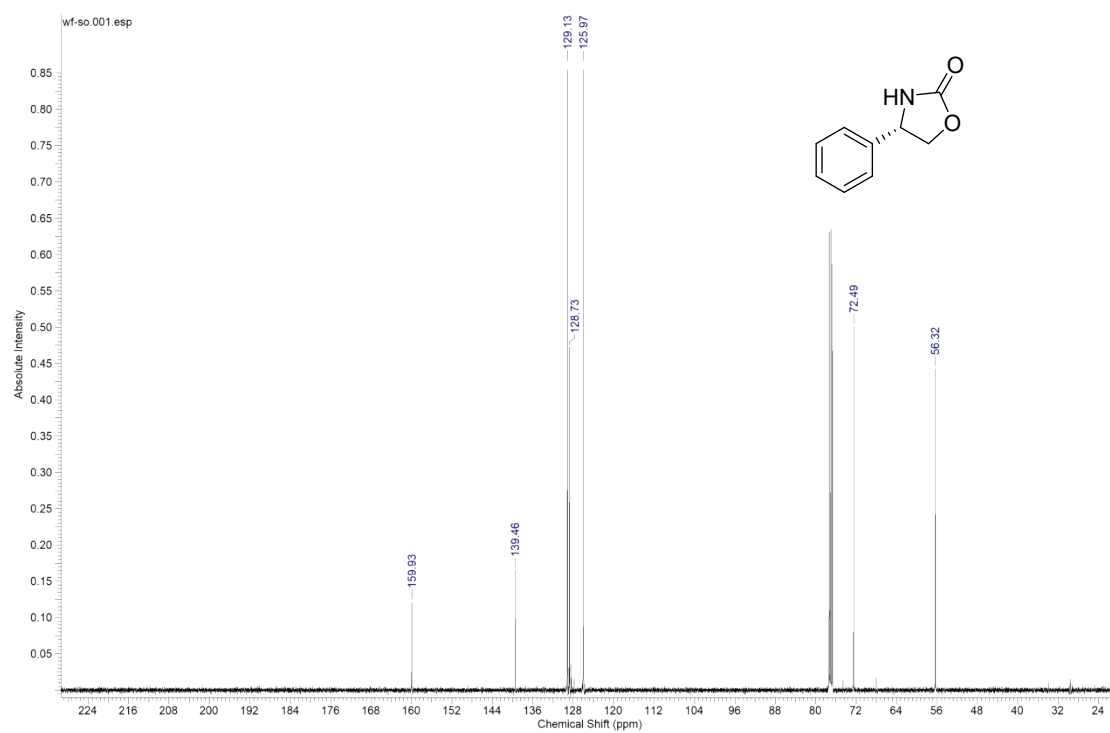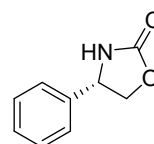

Fig. S31 NMR spectra copies of (*S*)-4-phenyloxazolidin-2-one (**2a**).

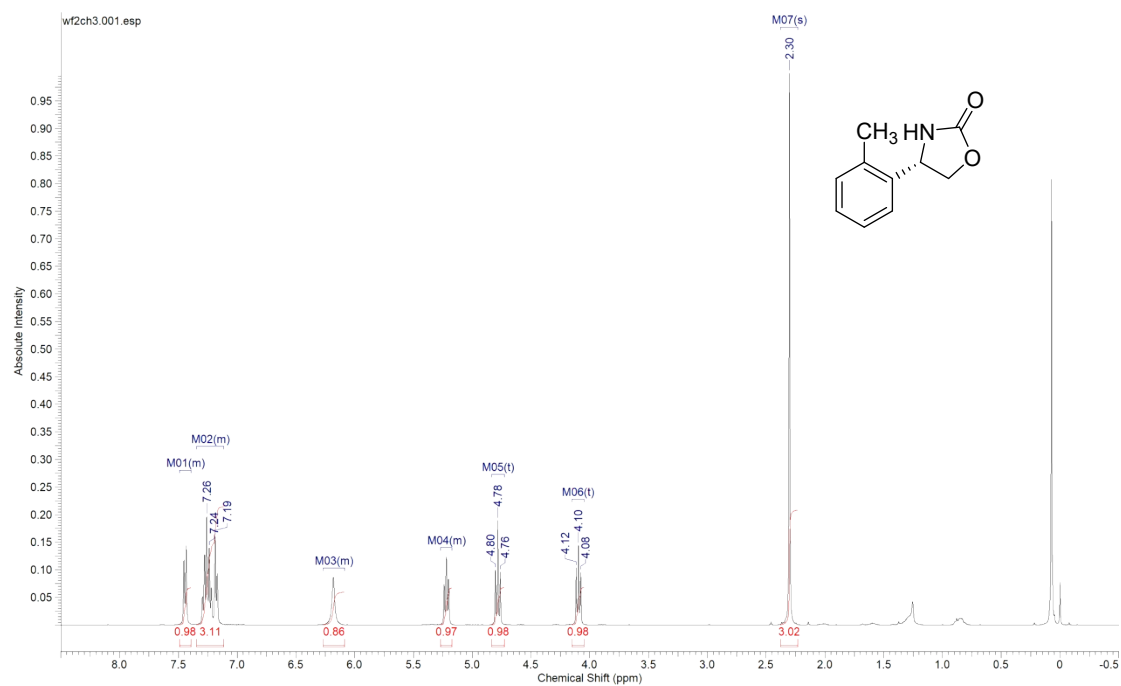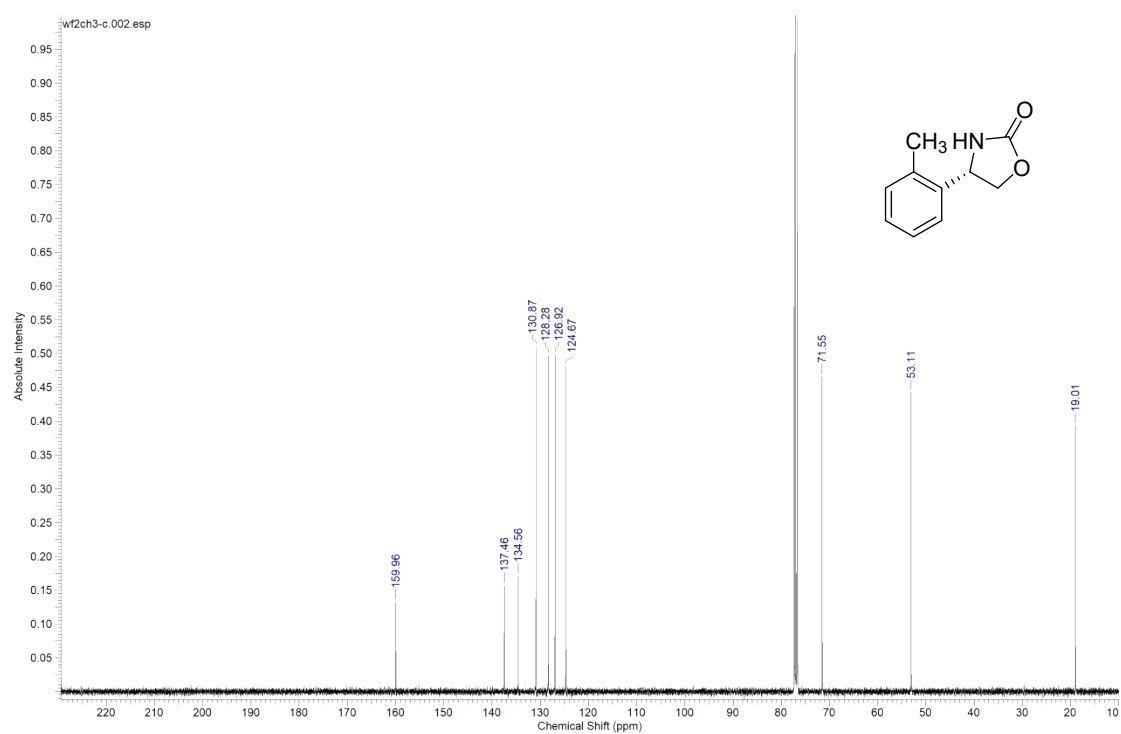

Fig. S32 NMR spectra copies of *(S)*-4-(*o*-tolyl)oxazolidin-2-one (**2b**).

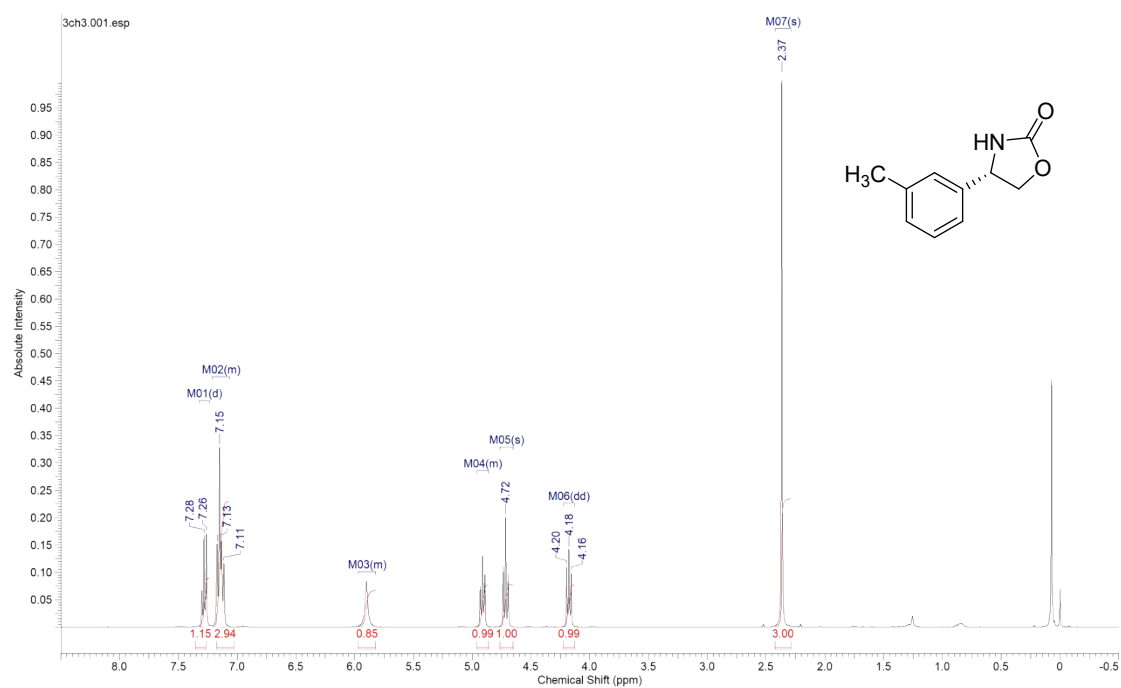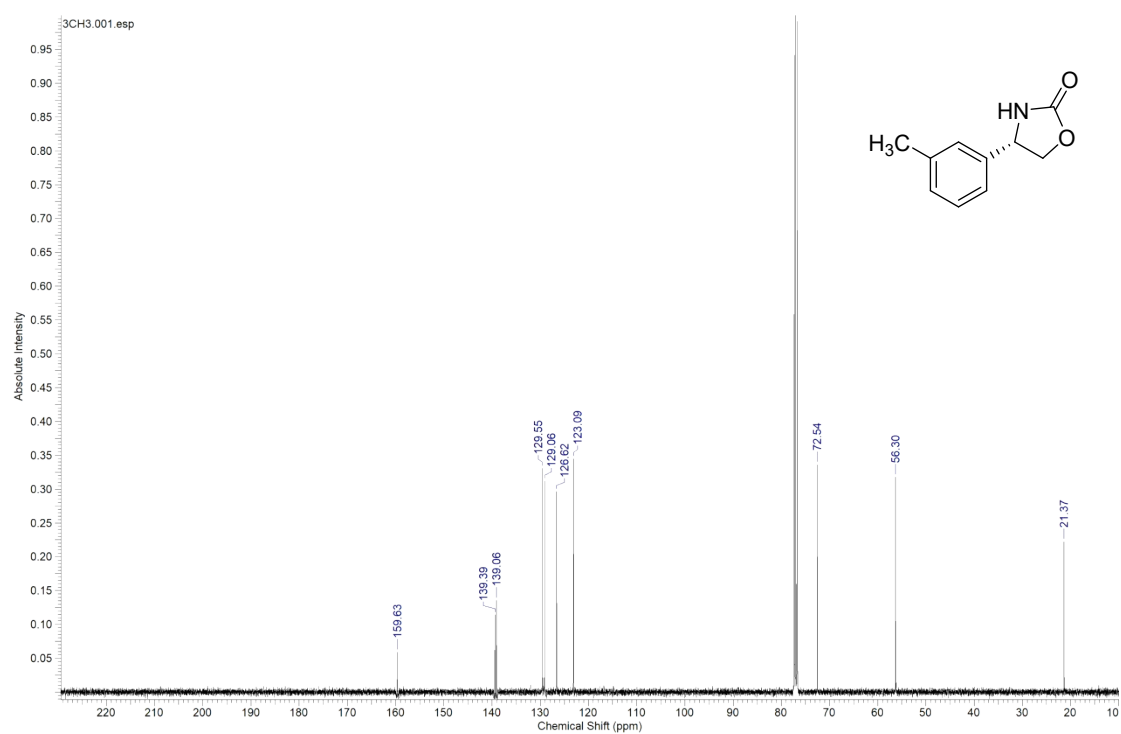

Fig. S33 NMR spectra copies of (*S*)-4-(*p*-tolyl)oxazolidin-2-one (**2c**).

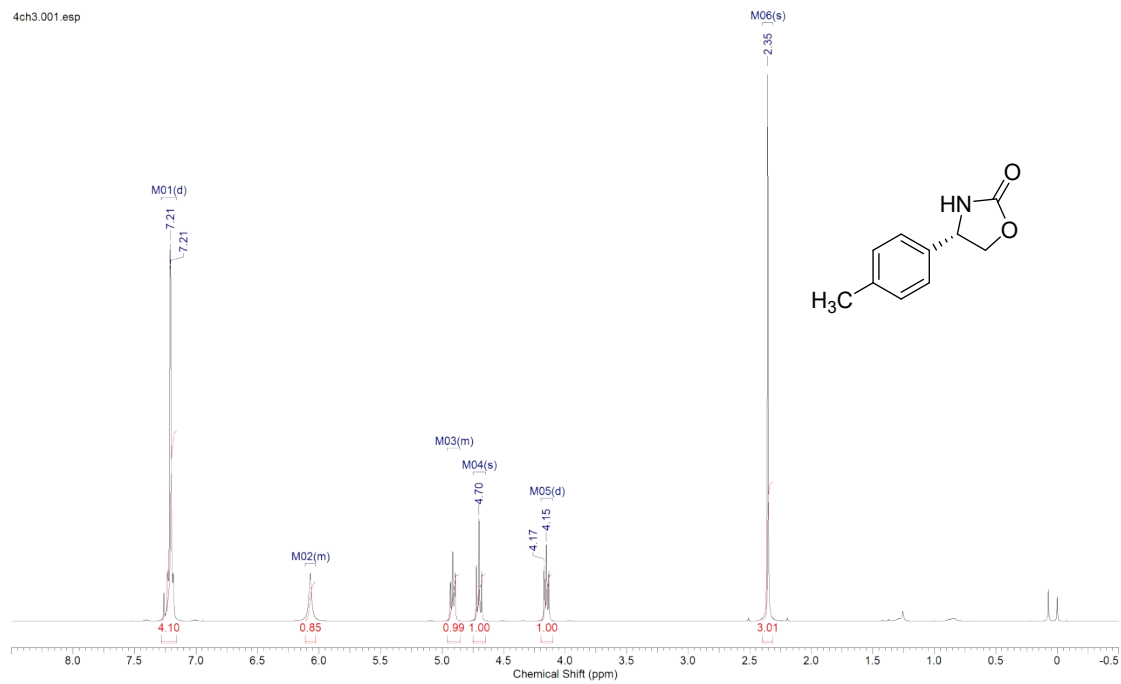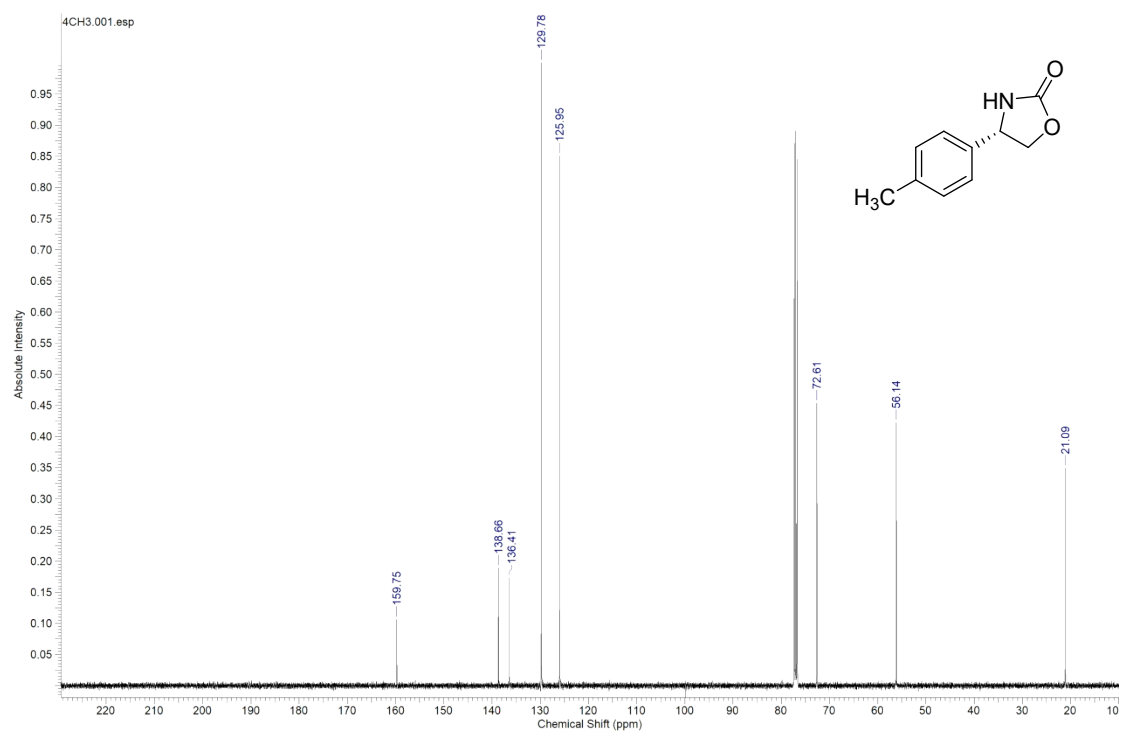

Fig. S34 NMR spectra copies of (*S*)-4-(*p*-tolyl)oxazolidin-2-one (**2d**).

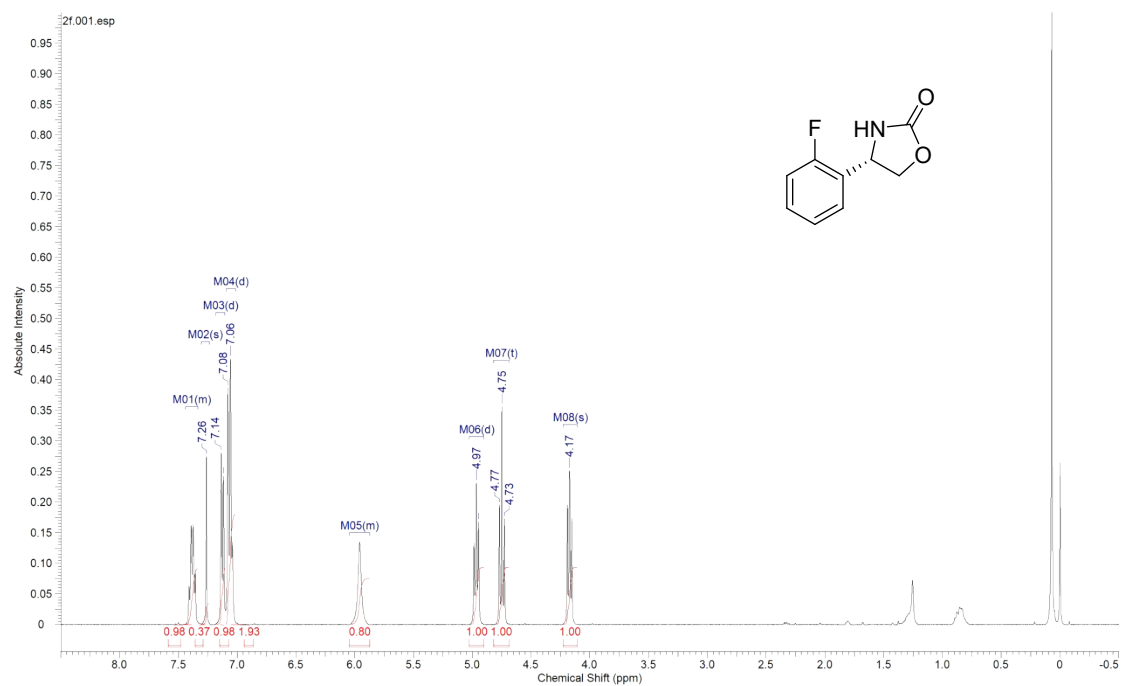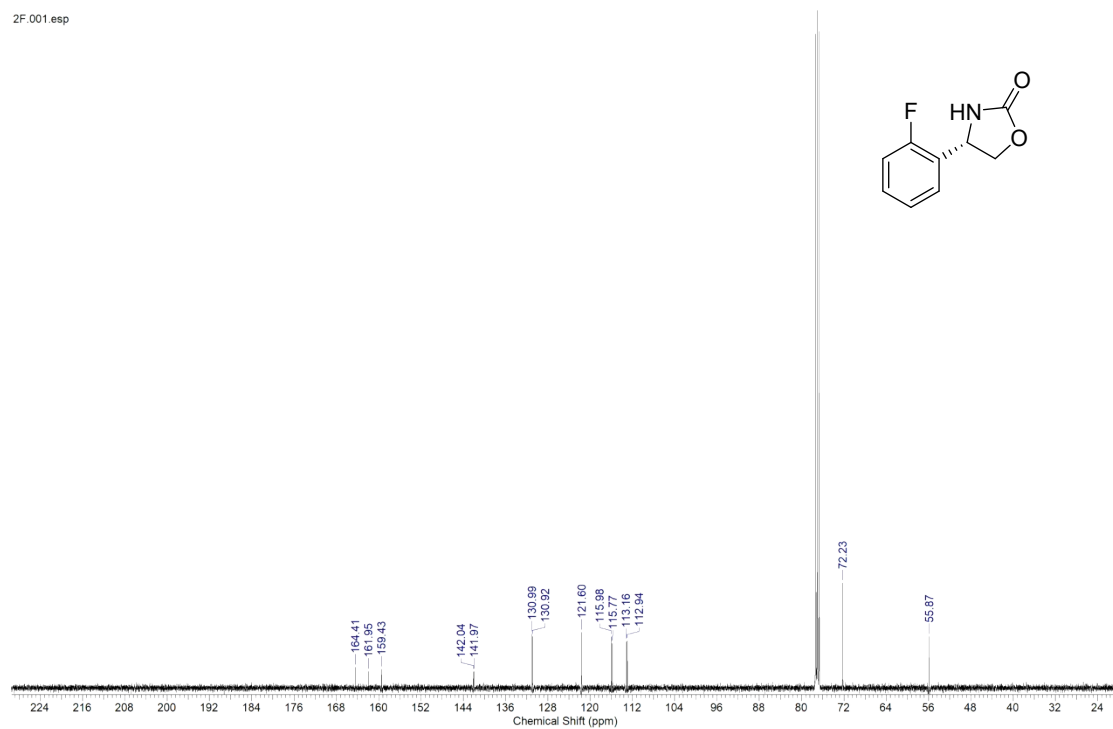

**Fig. S35** NMR spectra copies of *(S)*-4-(2-fluorophenyl)oxazolidin-2-one (**2e**).

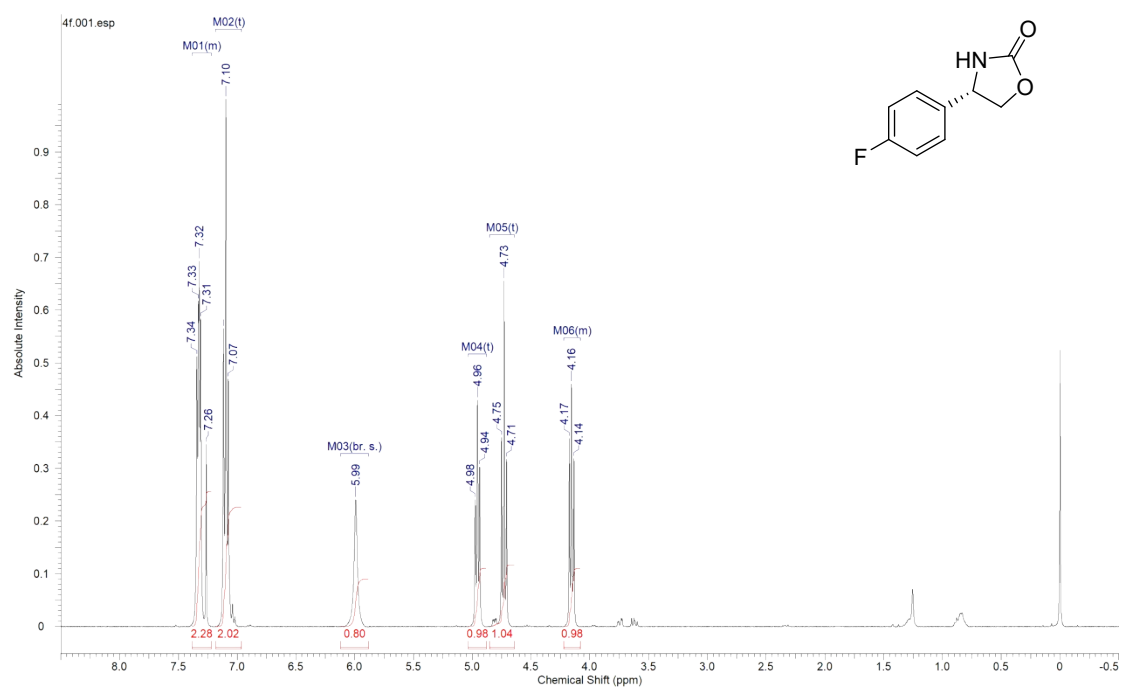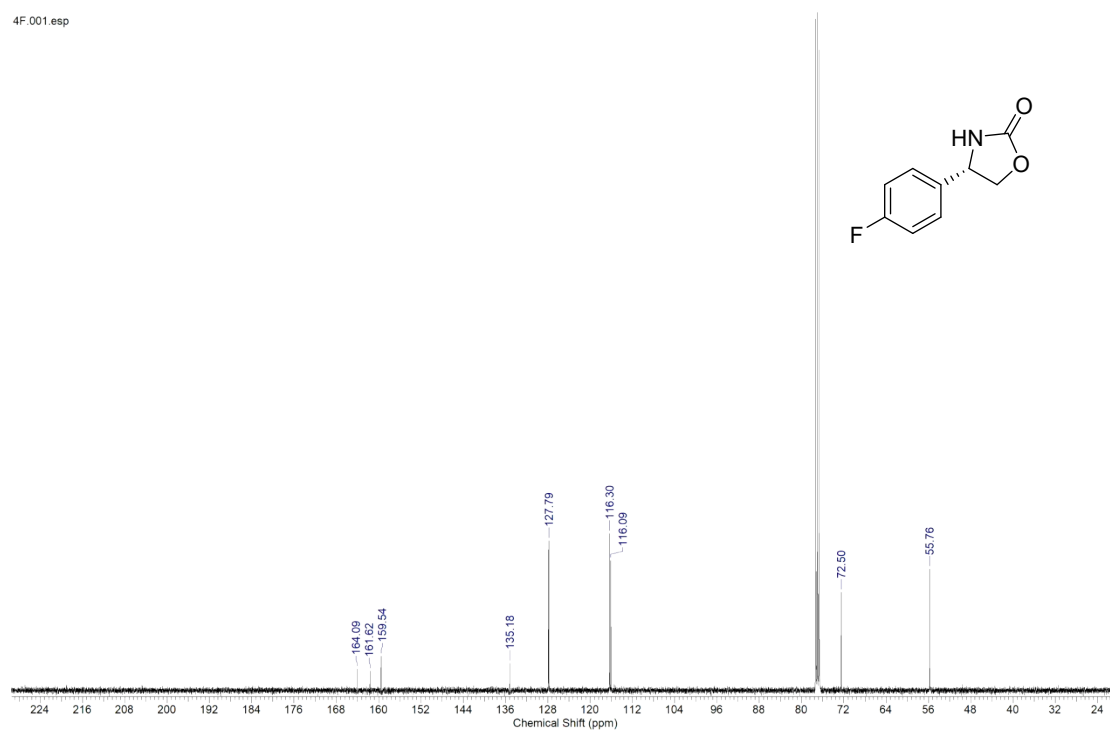

Fig. S36 NMR spectra copies of (*S*)-4-(4-fluorophenyl)oxazolidin-2-one (**2f**).

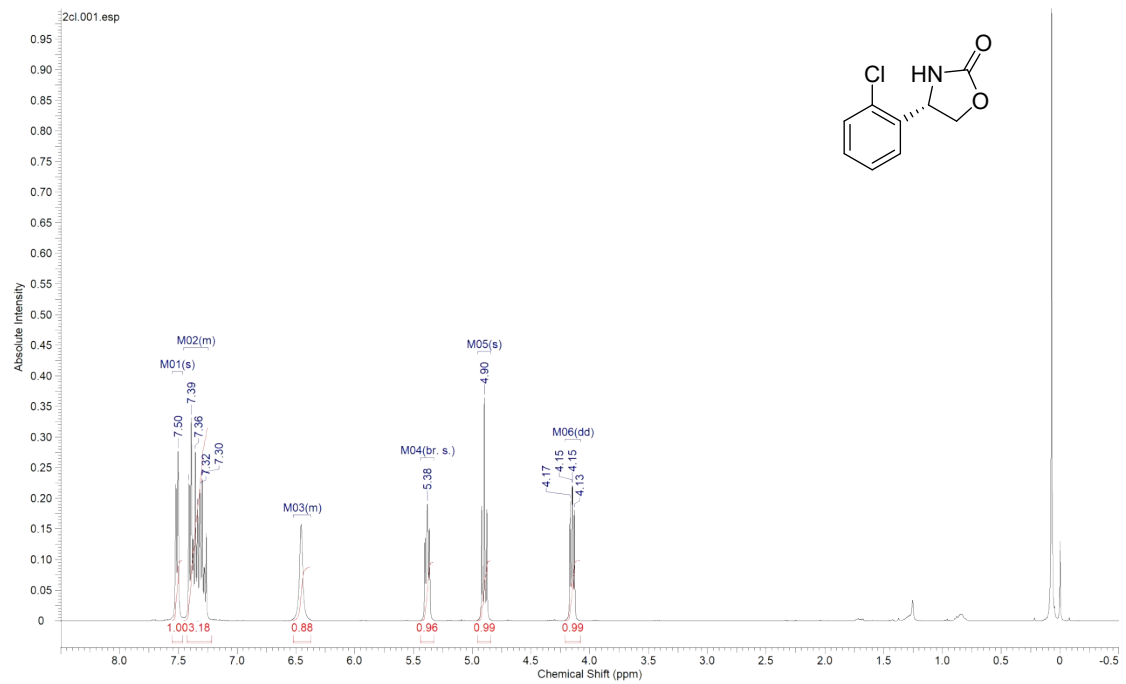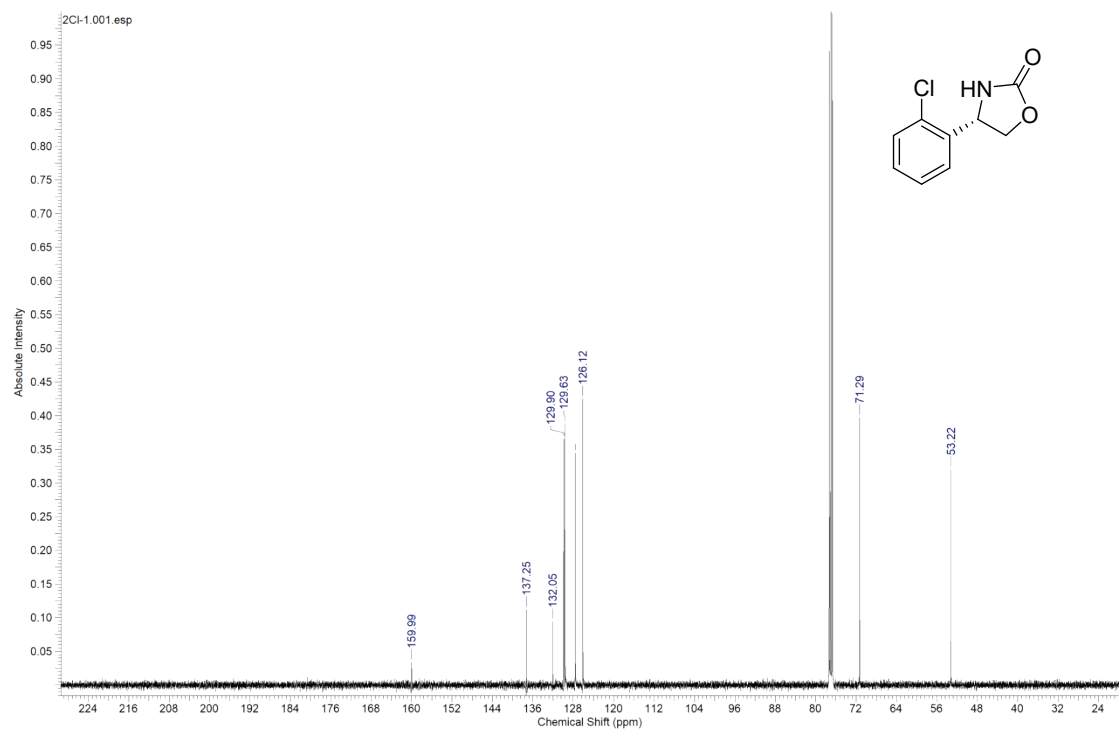

Fig. S37 NMR spectra copies of (*S*)-4-(2-chlorophenyl)oxazolidin-2-one (**2g**).



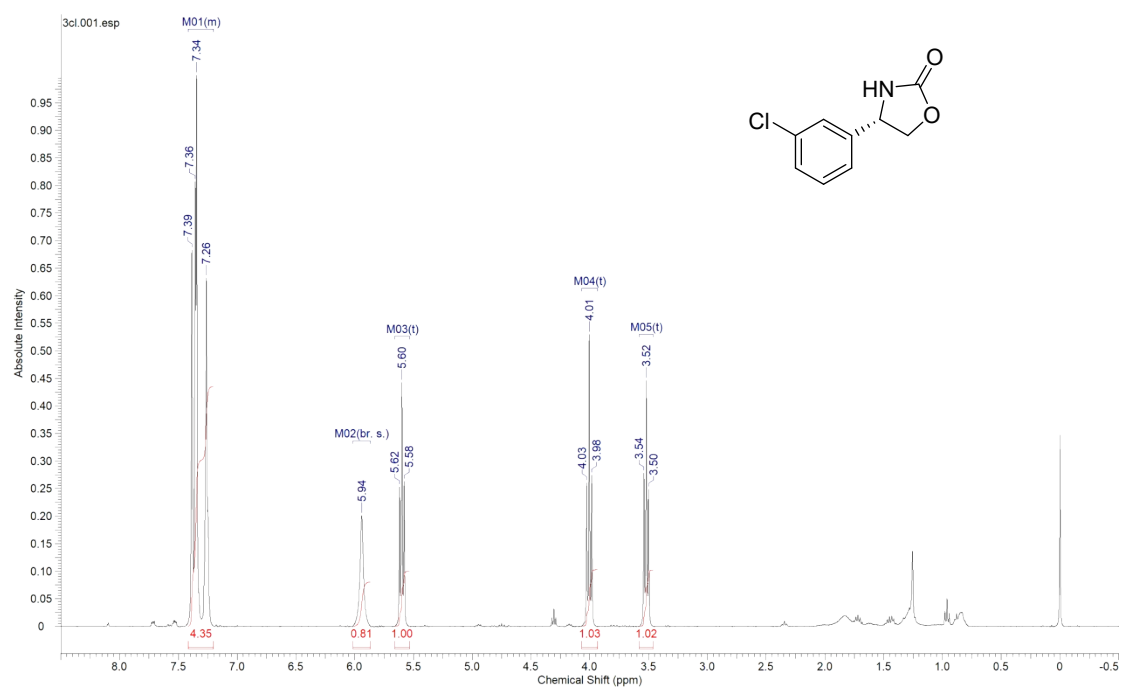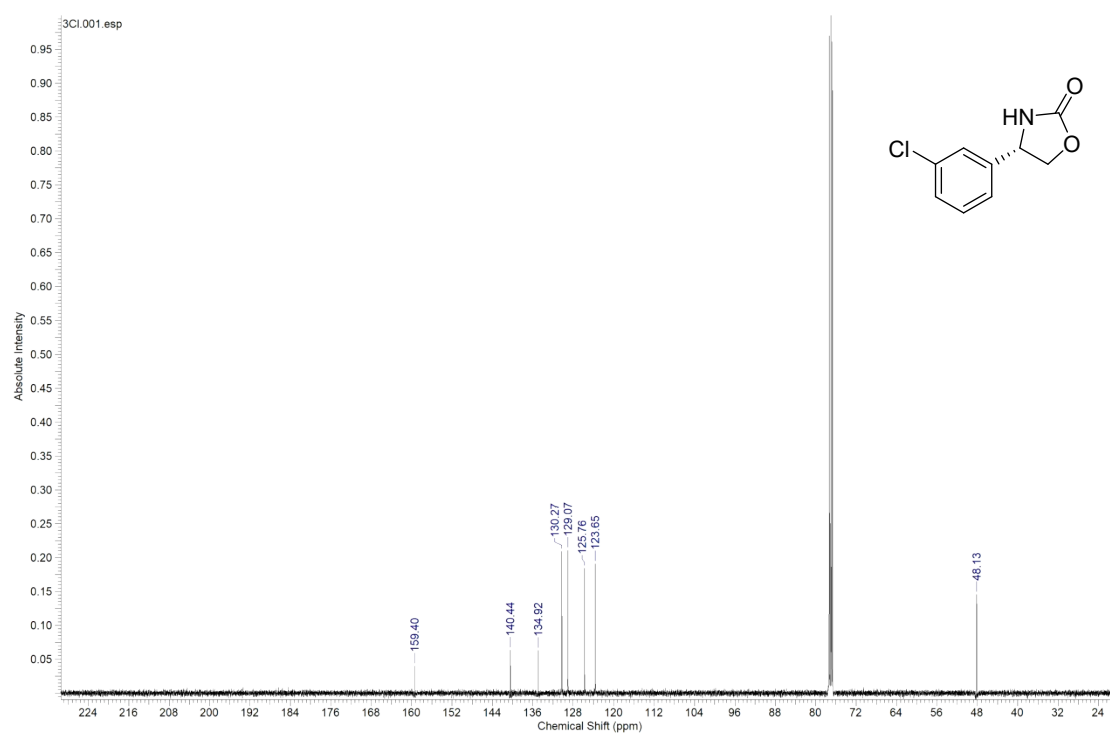

**Fig. S38** NMR spectra copies of *(S)*-4-(3-chlorophenyl)oxazolidin-2-one (**2h**).

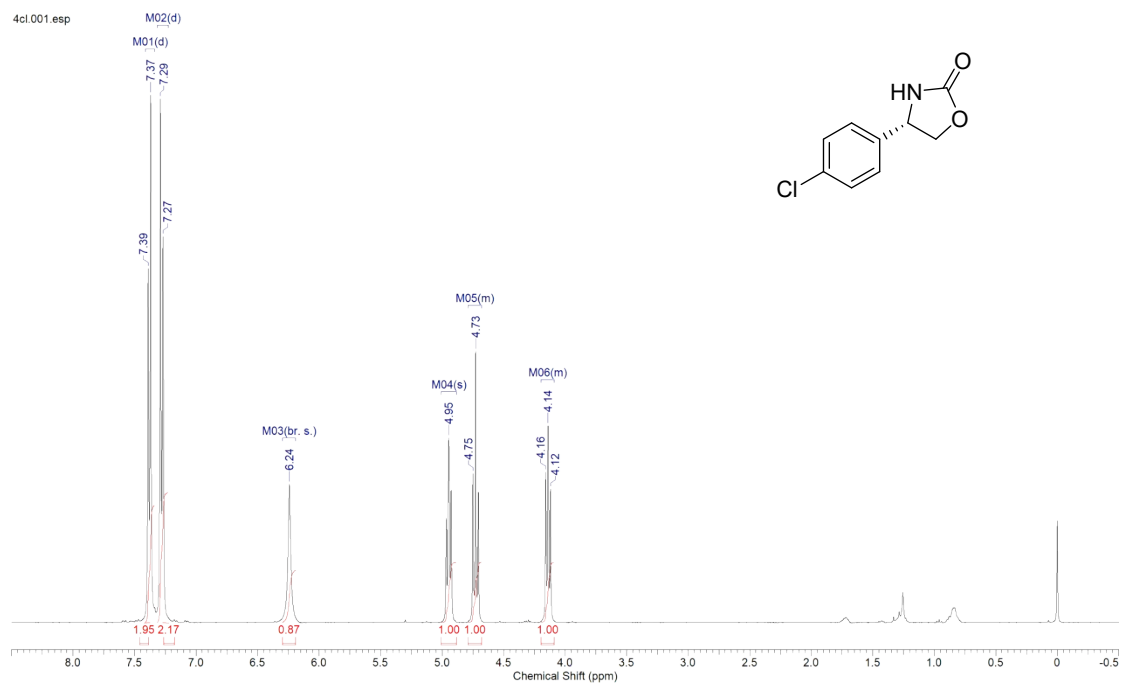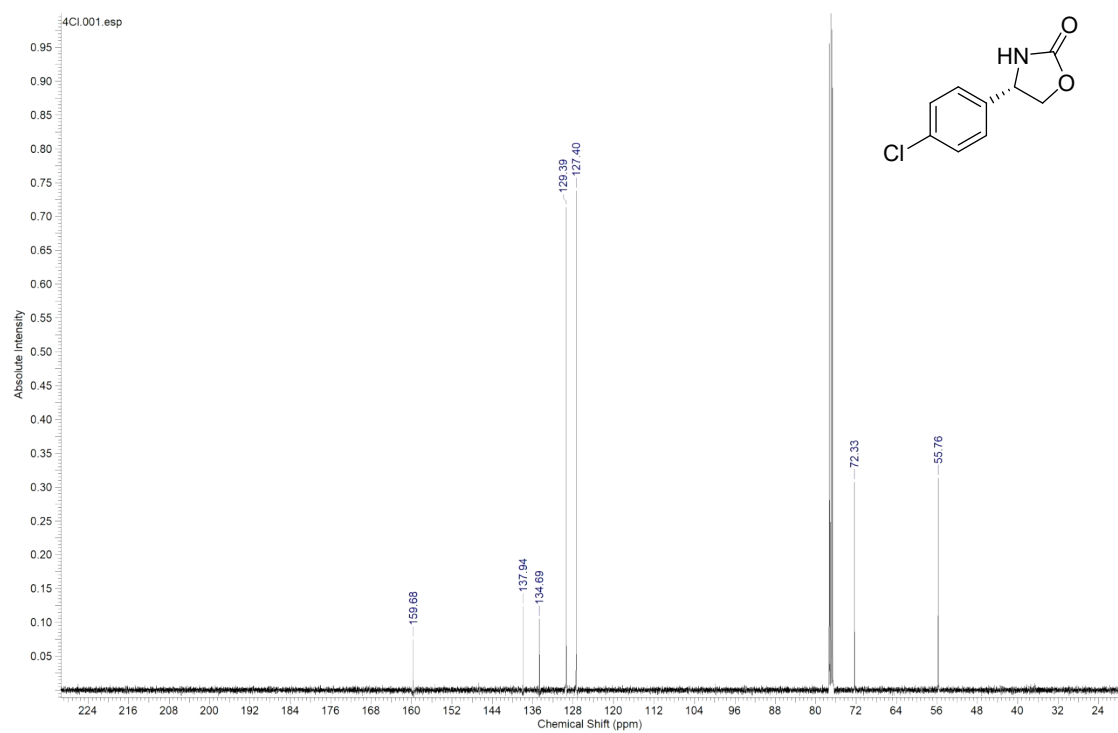

Fig. S39 NMR spectra copies of (*S*)-4-(4-chlorophenyl)oxazolidin-2-one (**2i**).

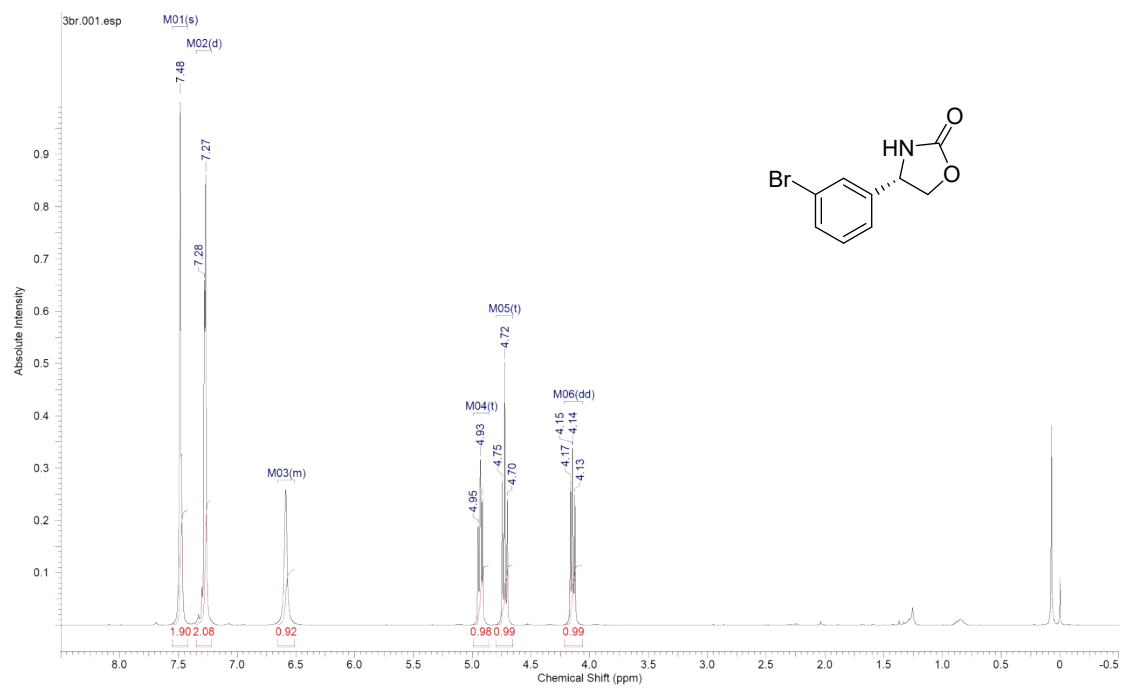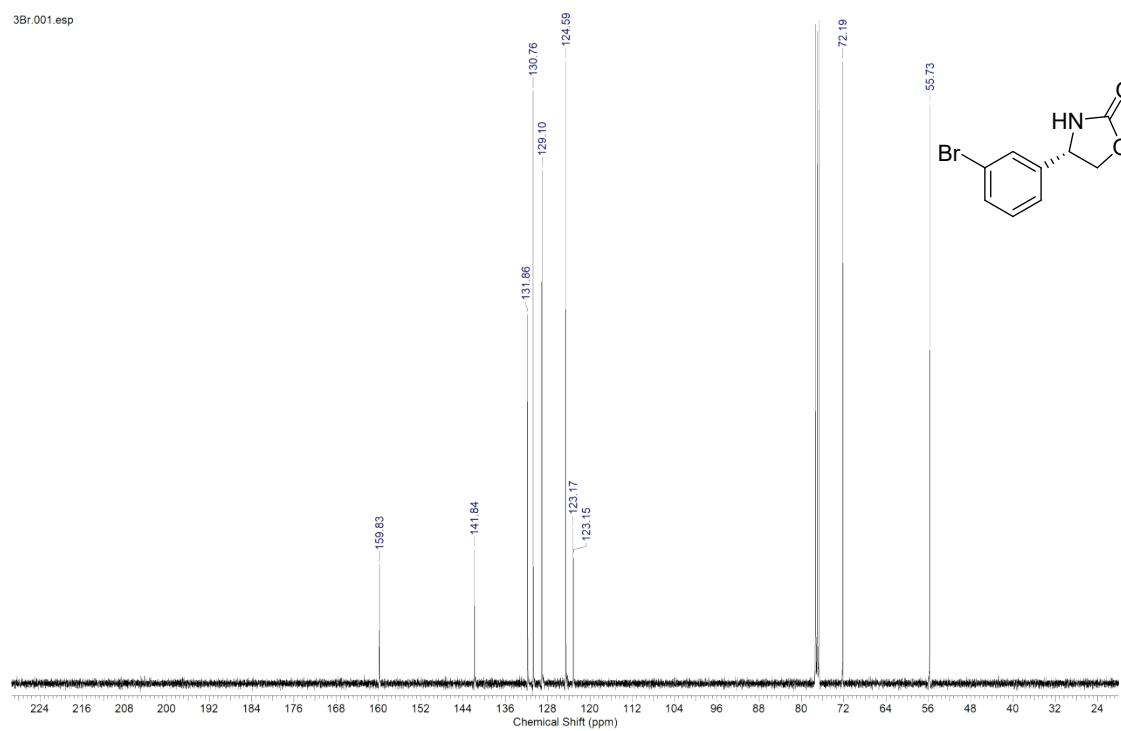

**Fig. S40** NMR spectra copies of (*S*)-4-(3-bromophenyl)oxazolidin-2-one (**2j**).

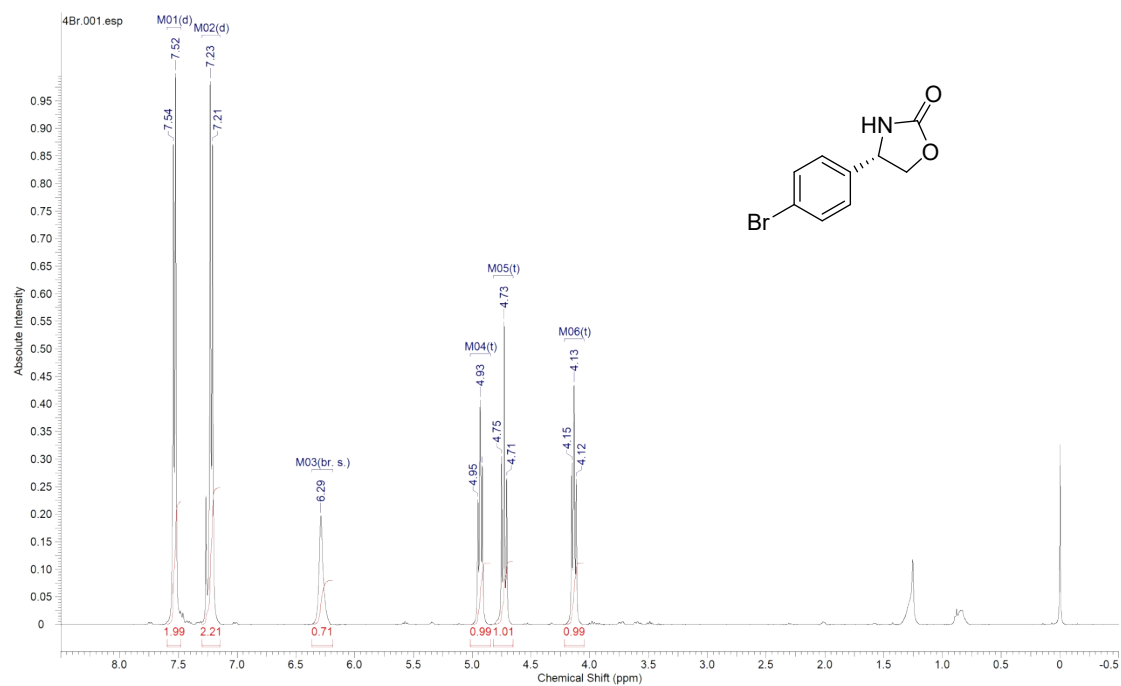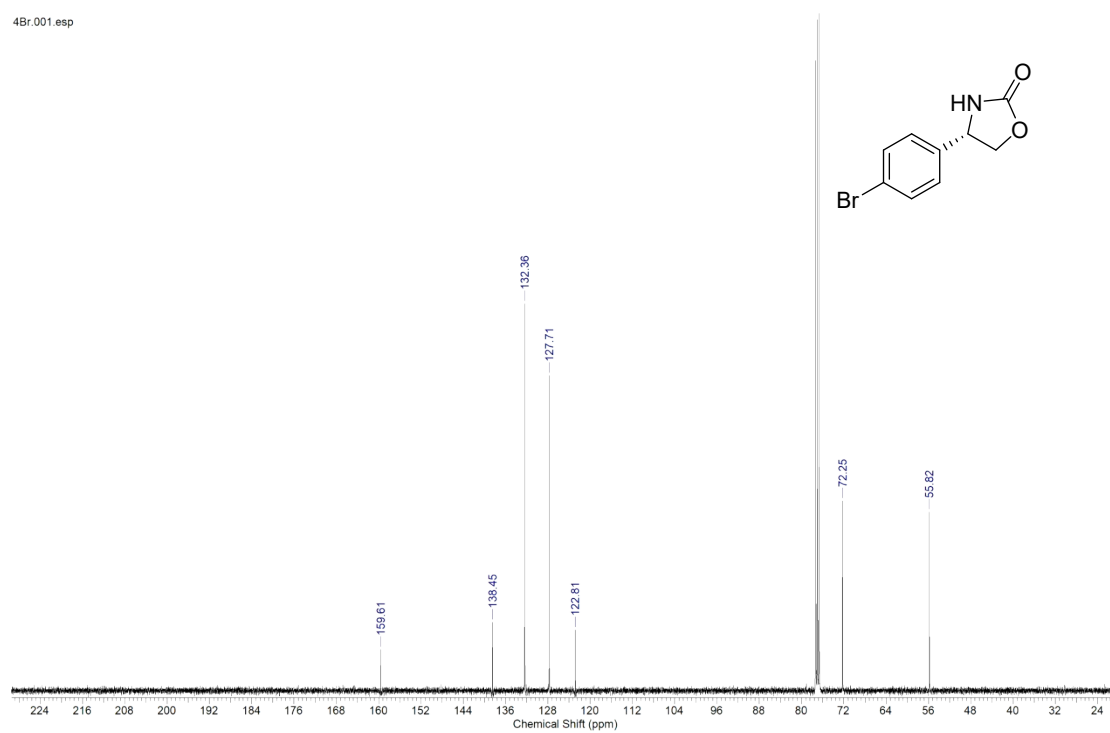

Fig. S41 NMR spectra copies of (*S*)-4-(4-bromophenyl)oxazolidin-2-one (**2k**).

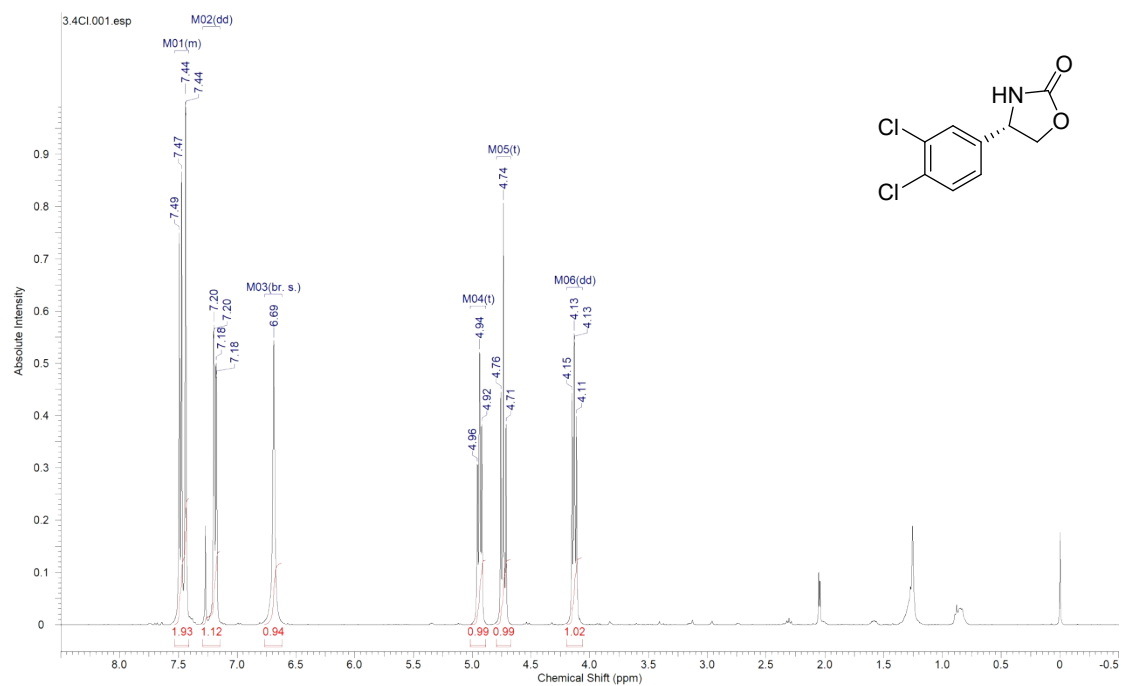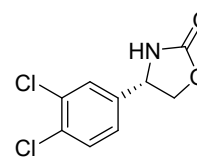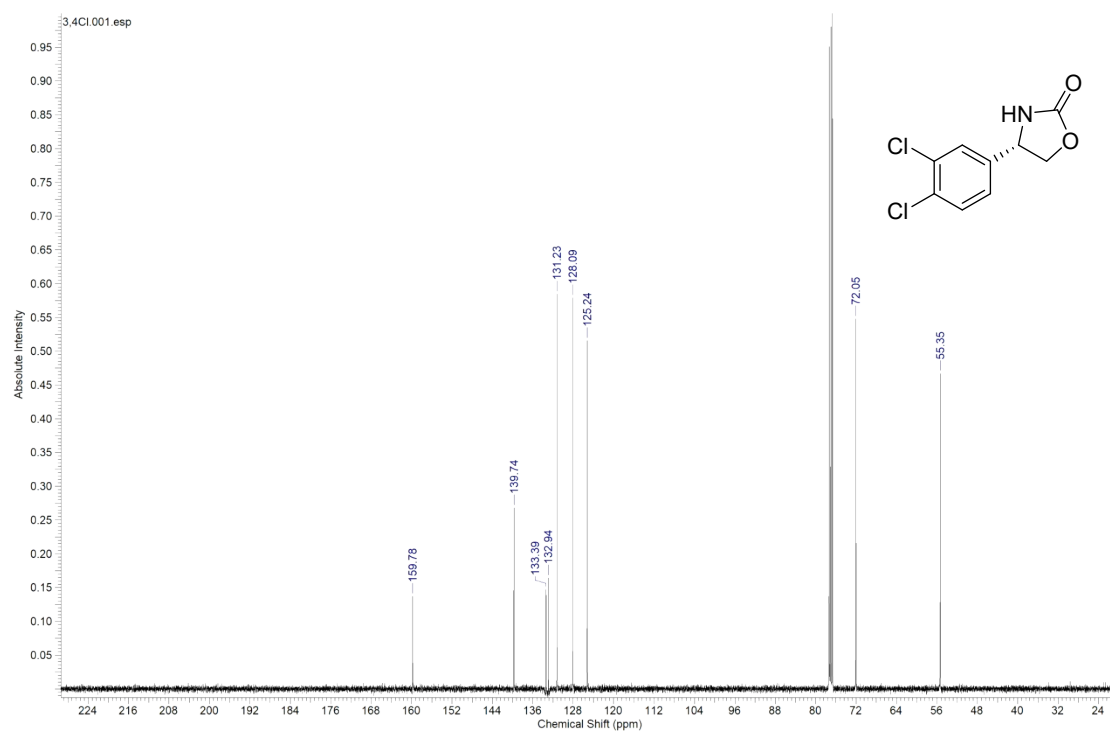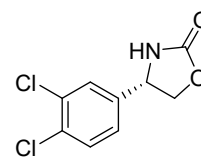

Fig. S42 NMR spectra copies of (S)-4-(3,4-dichlorophenyl)oxazolidin-2-one (21).

## References

- (1) O. Mazimba, R. R. Majinda and I. B. Masesane, *B. Chem. Soc. Ethiopia.*, 2011, **25**, 299-304.
- (2) F. L. Li, Y. Y. Qiu, Y. C. Zheng, F. F. Chen, X. D. Kong, J. H. Xu and H. L. Yu, *Adv. Synth. Catal.*, 2020, **362**, 4699-4706.
- (3) C. H. Zhou, X. Chen, T. Lv, X. Han, J. H. Feng, W. D. Liu, Q. Q. Wu and D. M. Zhu, *ACS. Catal.*, 2023, **13**, 4768-4777.
- (4) N. Wan, J. Tian, X. Zhou, H. Wang, B. Cui, W. Han and Y. Chen, *Adv. Synth. Catal.*, 2019, **361**, 4651-4655.
